1 **Desiccation resistance differences in *Drosophila* species can be**  
2 **largely explained by variations in cuticular hydrocarbons**

3

4 Zinan Wang<sup>1,2,\*</sup>, Joseph P. Receveur<sup>1,2,3</sup>, Jian Pu<sup>1,4</sup>, Haosu Cong<sup>1</sup>, Cole Richards<sup>1</sup>, Muxuan Liang<sup>5</sup>, and  
5 Henry Chung<sup>1,2,\*</sup>

6

7 <sup>1</sup> Department of Entomology, Michigan State University, East Lansing, MI 48824, USA

8 <sup>2</sup> Ecology, Evolution, and Behavior Program, Michigan State University, East Lansing, MI 48824, USA

9 <sup>3</sup> Institute for Genome Sciences, University of Maryland, Baltimore, MD, 21201, USA

10 <sup>4</sup> College of Agriculture, Sichuan Agricultural University, Chengdu, Sichuan 611130, China

11 <sup>5</sup> Department of Biostatistics, University of Florida, Gainesville, FL 32611, USA

12 \* Correspondence: [wangzina@msu.edu](mailto:wangzina@msu.edu) or [hwchung@msu.edu](mailto:hwchung@msu.edu)

13

14 **Keywords:** water balance, methyl-branched cuticular hydrocarbons, physiological mechanism, random  
15 forest

## 16 **Significance**

17 As our planet is becoming more arid due to global warming, preventing dehydration is key to the survival  
18 of insects, an essential part of our ecosystem. However, factors that determine how insects may evolve  
19 resistance to desiccation are relatively unknown. Using *Drosophila* species from diverse habitats, we  
20 showed that variations in the composition of cuticular hydrocarbons (CHCs), a hydrophobic layer found  
21 on insects to prevent evaporative water loss, can largely explain desiccation resistance differences. In  
22 addition, the evolution of longer methyl-branched CHCs (mbCHCs), underlies the evolution of higher  
23 desiccation resistance in this genus. As mbCHCs are ubiquitously present in most insects, we suggest  
24 that evolutionary changes in mbCHCs may be a general determinant of desiccation resistance across  
25 insect species.

## 26 **Abstract**

27  
28 Maintaining water balance is a universal challenge for organisms living in terrestrial environments,  
29 especially for insects, which have essential roles in our ecosystem. Although the high surface area to  
30 volume ratio in insects makes them vulnerable to water loss, insects have evolved different levels of  
31 desiccation resistance to adapt to diverse environments. To withstand desiccation, insects use a lipid  
32 layer called cuticular hydrocarbons (CHCs) to reduce water evaporation from the body surface. It has  
33 long been hypothesized that the waterproofing capability of this CHC layer, which can confer different  
34 levels of desiccation resistance, depends on its chemical composition. However, it is unknown which CHC  
35 components are important contributors to desiccation resistance and how these components can  
36 determine differences in desiccation resistance. In this study, we used machine learning algorithms,  
37 correlation analyses, and synthetic CHCs to investigate how different CHC components affect desiccation  
38 resistance in 50 *Drosophila* and related species. We showed that desiccation resistance differences  
39 across these species can be largely explained by variation in cuticular hydrocarbons. In particular, length  
40 variation in a subset of CHCs, the methyl-branched CHCs (mbCHCs), is a key determinant of desiccation  
41 resistance. We also showed a significant correlation between the evolution of longer mbCHCs and higher  
42 desiccation resistance. Given the ubiquitous presence of mbCHCs in insects, the evolution of mbCHCs  
43 may be a general mechanism of how insects evolve desiccation resistance and adapt to diverse and  
44 changing environments.

45

## 46 Introduction

47 Maintaining water balance is a universal challenge for organisms living in terrestrial environments where  
48 water constantly evaporates from the body surface (Hadley, 1994). Organisms such as insects have a  
49 high surface area to volume ratio due to their small sizes, rendering them vulnerable to water loss and  
50 desiccation (Gibbs, 2002b; Gibbs and Rajpurohit, 2010; K uhnel et al., 2017). Studies using closely related  
51 insect species collected worldwide showed that phylogenetically related insect species can have very  
52 different levels of desiccation resistance and occupy very distinct habitats, while insects that are  
53 phylogenetically distant but dwelling in similar habitats could have similar levels of desiccation resistance  
54 (Kellermann et al., 2012; Li et al., 2022; Menzel et al., 2017; Rane et al., 2019). This suggest that extant  
55 species have evolved different levels of desiccation resistance to survive in their different habitats.  
56 However, as climate change accelerates the expansion of dryland (Huang et al., 2016) and changes  
57 aridity in many areas across the globe (Sherwood and Fu, 2014; Shi et al., 2021), it is less understood  
58 how insect species, which are integral parts of our ecosystems, can evolve higher levels of desiccation  
59 resistance to adapt to the more arid environments.

60 To determine how insects can adapt to desiccation stress, understanding how insects conserve  
61 water and prevent desiccation is crucial. In insects, cuticular water loss is the leading cause of  
62 desiccation (Chown et al., 2011; Gibbs and Matzkin, 2001; Wang et al., 2021). In an extreme example,  
63 cuticular water transpiration has been found to account for 97% of increased water loss in queens of the  
64 harvester ant *Pogonomyrmex barbatus* (Johnson and Gibbs, 2004). To conserve water and prevent  
65 desiccation, a general mechanism in insects is the use of a lipid layer on the epicuticle, named cuticular  
66 hydrocarbons (CHCs) (Gibbs et al., 2003; Gibbs and Matzkin, 2001). This CHC layer, which can contain  
67 more than 100 different compounds on the same individual, provides a hydrophobic barrier against  
68 evaporative water loss through the cuticle (Blomquist and Ginzl, 2021). This was first demonstrated  
69 when the physical or chemical removal of this layer using abrasive dust and various solvents resulted  
70 increased water loss in various insect species in experiments published almost eight decades ago  
71 (Wigglesworth, 1945). In recent years, after the identification of a cytochrome P450 decarbonylase  
72 responsible for the synthesis of insect CHCs (Qiu et al., 2012), genetic manipulations of this gene in the  
73 fruitfly *Drosophila melanogaster* as well as in aphids and cockroaches, led to almost complete loss of  
74 CHCs and significant decrease in desiccation resistance (Chen et al., 2016; Chen et al., 2019; Qiu et al.,  
75 2012).

76 Variations in the composition of this CHC layer has been suggested to contribute to intraspecific  
77 variation in desiccation resistance in *D. melanogaster* (Rouault et al., 2004), the Mediterranean dung  
78 beetle *Onthophagus taurus* (Leeson et al., 2020), and the Argentine ant *Linepithema humile* (Buellesbach  
79 et al., 2018). This is supported by studies manipulating CHC composition either chemically or genetically,  
80 in different *Drosophila* species, producing different levels of desiccation resistance (Chiang et al., 2016;  
81 Chung et al., 2014; Ferveur et al., 2018; Koto et al., 2019; Savage et al., 2021). Together, these studies  
82 suggest that different components in the CHC layer can influence desiccation resistance.

83           The varying ability of these CHC components to prevent desiccation depends on its chemical  
84 structure, which in turn determines its melting temperatures (Gibbs and Pomonis, 1995; Gibbs, 1998;  
85 2002a). The melting temperature of the hydrocarbon is positively correlated with its water-proofing  
86 properties and contribution to desiccation resistance (Blomquist and Ginzal, 2021; Gibbs and Rajpurohit,  
87 2010). In *Drosophila* and most other insects, CHCs range in lengths between approximately 21 to 50  
88 carbons, and consist of linear alkanes (*n*-alkanes), alkenes (monoenes and dienes), and methyl-branched  
89 alkanes (Blomquist and Ginzal, 2021). Among them, *n*-alkanes have the highest melting temperature,  
90 followed by methyl-branched alkanes (mbCHCs), monoenes, and dienes. Increase in CHC chain length  
91 can also increase melting temperature and potentially leads to higher desiccation resistance (Gibbs and  
92 Pomonis, 1995). This is consistent with laboratory selection experiments in *D. melanogaster* selecting for  
93 increased desiccation resistance resulted in longer carbon-chain CHCs in the desiccation selected flies  
94 than the control flies (Gibbs et al., 1997; Kwan and Rundle, 2010). Longer CHC chain length is also  
95 correlated with climatic factors such as higher temperature and lower precipitation (Jezovit et al., 2017;  
96 Rouault *et al.*, 2004). These climatic factors are associated with desiccation resistance in *Drosophila*  
97 species (Hoffmann, 2010; Hoffmann and Weeks, 2007; Kellermann et al., 2018).

98           While the studies mentioned above showed strong evidence that CHCs and variations in CHC  
99 compositions are associated with desiccation resistance in insects, no study has investigated the extend  
100 that CHC variation can determine desiccation resistance and whether we can identify the important CHC  
101 components that underlie variation in desiccation resistance across different species. Several large scale  
102 studies produced large datasets in determining the evolution of desiccation resistance across closely  
103 related *Drosophila* species (Kellermann *et al.*, 2018; Kellermann *et al.*, 2012; Matzkin et al., 2009) and ant  
104 species (Bujan et al., 2016; Hood and Tschinkel, 1990). Other studies produced large datasets in CHC  
105 variation across species (Khallaf et al., 2021; Menzel *et al.*, 2017; Nunes et al., 2017; Van Oystaeyen et  
106 al., 2014) and focused on the communication aspects of CHCs. However, variations in CHCs and  
107 differences in desiccation resistance have not been experimentally connected in a phylogenetic  
108 framework. Analyzing CHC profiles and desiccation resistance across closely related species measured  
109 at the same condition can determine important CHC components that could predict various levels of  
110 desiccation resistance. Understanding the mechanisms underlying desiccation resistance and examining  
111 the evolution of these traits is key to predicting the species' responses in facing drier environments that  
112 could result from future climate change (Chown et al., 2010).

113           In this study, we used a cohort-based experimental design of 50 *Drosophila* and related species,  
114 and experimentally determined their CHC compositions and desiccation resistance under similar  
115 conditions. Using a random forest machine learning algorithm, we built decision trees connecting CHC  
116 components and desiccation resistance in the 50 species and tested their correlation. First, we  
117 determined that CHC variations can largely explain differences in desiccation resistance across these  
118 species. Second, we identified a subset of CHCs, the methyl-branched CHCs (mbCHCs), as the most  
119 important CHC components that can determine desiccation resistance across these species. Third, we



120 determined that the evolution of mbCHCs is also significantly correlated with evolution of higher  
121 desiccation resistance in *Drosophila* species. Given that mbCHCs are almost ubiquitous in insect species,  
122 we suggest that evolution of mbCHCs can be a general mechanism for insect species to evolve higher  
123 levels of desiccation resistance and adapt to more arid environments.

124

125

## 126 **Results**

### 127 **A cohort-based experimental design for determining correlations between CHCs and desiccation** 128 **resistance**

129 To investigate how CHC variation across an evolutionary gradient affects desiccation resistance, for our  
130 experiments, we selected 46 *Drosophila* species representing both the *Sophophora* subgenus and the  
131 *Drosophila* subgenus, as well as three *Scaptodrosophila* species and one *Chymomyza* species, (**Figure**  
132 **S1**). As the assays for CHCs and desiccation resistance cannot be performed on the same individuals,  
133 we used a cohort-based experimental design (**Figure 1**) where subsets of each cohort (5-6 per species)  
134 were used for GC-MS determination of CHC profiles, desiccation resistance assays, and measuring body  
135 weight of the F1 progeny for each sex. Therefore, all measurements were performed at the cohort level.

136 Desiccation resistance varied across these 50 species with desert-dwelling species from the  
137 repleta group showing the highest desiccation resistance (e.g., *D. mojavensis* males:  $58.2 \pm 4.7$  hours)  
138 and species from melanogaster group showing the lowest desiccation resistance (e.g., *D. mauritiana*  
139 males:  $2.7 \pm 0.2$  hours) (**Figure 2, Figure S2**), consistent with the findings of previous research  
140 (Kellermann *et al.*, 2012; Matzkin *et al.*, 2009). GC-MS analyses of the CHCs in these 50 species  
141 detected five types of CHCs with different carbon-chain lengths and quantities, including linear alkanes  
142 (*n*-alkanes), methyl-branched alkanes (mbCHCs; the methyl branch is on the second carbon), monoenes  
143 (with one double bond), dienes (with two double bonds), and trienes (with three double bonds) (**Figure**  
144 **S3**). *n*-alkanes, which have the highest melting temperatures, were only present in species from the  
145 melanogaster group, some of which have the lowest desiccation resistance among the species tested in  
146 this study. This suggests that *n*-alkanes may not make a general contribution to desiccation resistance  
147 across *Drosophila* species. Trienes, which have the lowest melting temperatures, were only present in  
148 eight species with low to moderate quantities. The other three types of CHCs, the mbCHCs, monoenes  
149 and dienes, were observed in most species tested in our study.

150

### 151 **Higher relative quantities of CHCs are not primarily responsible for higher desiccation resistance**

152 We first sought to determine if higher desiccation resistance in flies could be due to having higher  
153 amounts of CHCs. One caveat in the analysis between absolute CHC quantity and desiccation resistance  
154 is a possible correlation between CHC quantities and body size: species with larger body size may  
155 possess higher quantities of CHCs. This can lead to potential biases when directly determining

156 correlations between CHC quantities and desiccation resistance. Species with higher body weight can  
157 also have higher absolute water content and a lower surface area to volume ratio due to their larger size,  
158 which may also lead to higher desiccation resistance (Wang *et al.*, 2021).

159 Our initial analyses showed a significant positive correlation (Females:  $r = 0.4$ ,  $P < 0.001$ ; Males:  $r$   
160  $= 0.5$ ,  $P < 0.001$ ) between body weight and desiccation (**Figure 3A**). We also found a significant positive  
161 correlation between body weight and total amount of CHCs (Female:  $r = 0.7$ ,  $P < 0.001$ ; Male:  $r = 0.7$ ,  $P <$   
162  $0.001$ ) (**Figure 3B**), suggesting that variation in the body weight (or size) of different species may be a  
163 confound in determining the relationship between CHC quantity and desiccation resistance. To take this  
164 confound into consideration, we normalized the total CHC quantity by dividing by the body weight for  
165 each species. This shows that CHCs account for 0.02 to 0.5% of the total body weight of different species  
166 (**Figure S4**). Analyses between the normalized CHC quantity and desiccation resistance showed no  
167 correlation between these two variables in males (Male:  $P = 0.1$ ) and positive correlation in females  
168 (Female:  $r = 0.1$ ,  $P = 0.03$ ) (**Figure 3C**). The low value of  $r$  (0.1) indicates a weak correlation between  
169 CHC quantities and desiccation resistance in females. This suggests that having higher amounts of CHCs  
170 only has a limited contribution to higher desiccation resistance.

#### 171 **mbCHCs are important determinants of desiccation resistance**

173 As total CHC quantity is not a main contributor to desiccation resistance in our study, we hypothesized  
174 that the composition of CHC profiles may be important for desiccation resistance. To test this hypothesis,  
175 we applied a permutational multivariate analysis of variance (PERMANOVA) to test whether the  
176 composition of CHCs differed across desiccation resistance (Anderson *et al.*, 2006). The PERMANOVA  
177 analysis use beta diversity to represent differences in CHC compositions in these species and showed  
178 that the beta diversity of CHC compositions differs significantly across the increasing desiccation  
179 resistance ( $r^2 = 0.1$ ,  $P < 0.001$ ; **Figure S5**), suggesting that CHC composition is important for desiccation  
180 resistance. We further sought to identify individual components of CHC profiles that are important  
181 determinants of desiccation resistance. To test if variation in CHC components can be used to determine  
182 desiccation resistance, we applied a random forest regression method that uses decision trees to connect  
183 the variables of interest (Liaw and Wiener, 2002; Svetnik *et al.*, 2003), e.g., CHC composition and  
184 desiccation resistance, and identified the importance of individual CHC components to predict desiccation  
185 resistance. In this analysis, we treated the CHC profiles of each species and sex as an individual dataset,  
186 giving us 100 datasets (50 species x 2 sexes) with 5 to 6 individual CHC profiles each. We then  
187 correlated the decision trees that generated from the CHC composition with desiccation resistance. The  
188 prediction process can identify key CHC components that are important contributors to desiccation  
189 resistance.

190 Random forest modeling of CHC composition was able to explain 85.5% of the variation in  
191 desiccation resistance (Out of Bag Estimate: Root Mean Square Error 'RMSE' = 4.5) (**Figure 4A**). Models  
192 built with a 70:30 training/test split ( $n = 382$ ,  $n = 164$ ) performed similarly to models built with out of bag

193 estimate (RMSE = 5.4, **Figure S6**). Four mbCHCs were identified as having the highest contribution to  
194 predicting desiccation resistance in the regression model (listed in decreasing importance: 2MeC30,  
195 2MeC28, 2MeC32, and 2MeC26), while many other CHCs did not substantially contribute to predicting  
196 desiccation resistance (**Figure 4B**). These results suggest that CHCs, and mbCHCs in particular, are  
197 important predictors of desiccation resistance in *Drosophila* species.

### 198 199 **Longer mbCHCs confer higher desiccation resistance**

200 We further sought to determine how mbCHCs contribute to desiccation resistance. As each species  
201 produces different combinations of these mbCHCs that are correlated with each other (**Figure S7**), we did  
202 not perform correlation analyses on these mbCHCs with a single regression model due to multicollinearity  
203 issues (Belsley et al., 2005). Instead, we performed correlation analyses between each of the most  
204 important CHCs identified from the random forest modeling, 2MeC26, 2MeC28, 2MeC30, and 2MeC32,  
205 and desiccation resistance. We found that the quantity of 2MeC26 negatively correlates with desiccation  
206 resistance in males ( $r = -0.4$ ,  $P < 0.001$ ) but no significant correlation was identified in females ( $P = 0.1$ )  
207 (**Figure 5A**). Significant positive correlations were observed between quantities of the longer mbCHCs  
208 and desiccation resistance for females (2MeC28:  $r = 0.4$ ,  $P < 0.001$ ; 2MeC30:  $r = 0.2$ ,  $P = 0.009$ ; 2MeC32:  
209  $r = 0.3$ ,  $P < 0.001$ ) and males (2MeC28:  $r = 0.4$ ,  $P < 0.001$ ; 2MeC32:  $r = 0.4$ ,  $P < 0.001$ ) (**Figure 5B-D**).  
210 However, no significant correlation was observed between quantity of 2MeC30 and desiccation  
211 resistance in males (**Figure 5C**). These results suggested the production of longer mbCHCs could play a  
212 role in higher desiccation resistance.

213 To investigate the above results suggesting that longer mbCHCs could underlie higher  
214 desiccation resistance in *Drosophila* species, we performed desiccation assays on *D. melanogaster*  
215 coated with synthetic mbCHCs of different lengths (2MeC26, 2MeC28, and 2MeC30) at 25°C. While  
216 previous studies showed that a mixture of 2MeC26, 2MeC28, and 2MeC30 can rescue desiccation  
217 resistance in *D. melanogaster* flies without CHCs, experiments were not performed on individual mbCHCs  
218 for desiccation resistance (Krupp et al., 2020). Our desiccation assays showed that the coating of  
219 2MeC26 did not increase desiccation resistance in both sexes (*post hoc* comparison with Tukey's method  
220 followed by one-way ANOVA. Female:  $P = 0.07$ ; Male:  $P = 1.0$ ), while 2MeC30 significantly increased  
221 desiccation resistance in female *D. melanogaster* ( $t = 11.2$ ,  $P < 0.001$ ), and both 2MeC28 ( $t = 4.6$ ,  $P$   
222  $< 0.001$ ) and 2MeC30 ( $t = 6.9$ ,  $P < 0.001$ ) significantly increased desiccation resistance in male *D.*  
223 *melanogaster* (**Figure 5E**). This suggests that production of longer mbCHCs can lead to higher  
224 desiccation resistance.

### 225 226 **Evolution of mbCHCs underlies variation in desiccation resistance in *Drosophila* species**

227 We have shown that mbCHCs are important determinants of desiccation resistance in *Drosophila* species  
228 and experimentally coating insects with longer mbCHCs confers higher desiccation resistance. To further  
229 determine whether the evolution of mbCHCs underlies the variation in desiccation resistance in  
230 *Drosophila* species, we first examined the evolutionary trajectory of mbCHCs and then tested the

231 correlation between mbCHCs and desiccation resistance with phylogenetic correction. We mapped the  
232 evolution of mbCHC composition in the *Drosophila* genus using ancestral trait reconstruction and tested  
233 the phylogenetic signal using Pagel's  $\lambda$  (Freckleton et al., 2015; Goolsby et al., 2017). Ranging from 0 to 1,  
234 Pagel's  $\lambda$  measures the extent to which the variance of the trait can be explained by the phylogeny and  
235 therefore determines the degree of association between the trait evolution and the phylogeny (Lynch,  
236 1991). If  $\lambda$  is closer to 1, the evolution of the trait has a higher association with the phylogeny.  
237 Phylogenetic signals in mbCHCs were detected for both females and males with  $\lambda = 0.75$  and  $0.83$ ,  
238 respectively (**Table S1**). This suggests a moderate to strong association between mbCHC evolution and  
239 phylogeny. The derived ancestral state for mbCHCs in the *Drosophila* genus suggest that 2MeC28 and  
240 2MeC30 are the major mbCHCs. (**Figure S8**). The evolutionary trajectory of mbCHC composition showed  
241 repeated evolution in the lengths of mbCHCs, as well as their quantities. Independent evolution of longer  
242 mbCHCs was observed in four clades of species, including the willistoni, nasuta, and repleta groups, and  
243 the ananassae subgroup (including *D. ananassae*, *D. pseudoananassae*, and *D. bipectinata*), while  
244 shorter mbCHCs were mainly observed in several species in the melanogaster subgroup (e.g., *D.*  
245 *melanogaster*, *D. simulans*, and *D. teissieri*) (**Figure 2 & S8**).

246 Desiccation resistance also has a strong association with the phylogeny of *Drosophila* species  
247 (**Table S2**) (Kellermann et al., 2018; Kellermann et al., 2012). We sought to determine if the variation of  
248 desiccation resistance could be explained by the evolution of mbCHCs in these species. We used a  
249 Phylogenetic Generalized Linear Square (PGLS) model to test for the correlation between mbCHCs and  
250 desiccation resistance when controlling the effects from the phylogenetic relationship of the species  
251 (Grafen, 1989; Mundry, 2014). Since mbCHCs are produced in a linear pathway with each species  
252 producing several different mbCHCs, we selected the mbCHC with the longest carbon-chain length in the  
253 species as the proxy to represent the lengths of mbCHCs in each species. We incorporated the quantity,  
254 length, and their interaction in the PGLS model for the longest mbCHC. The interaction term between the  
255 length and quantity of the longest mbCHC in the model can determine how the two variables  
256 combinatorically affect desiccation resistance. PGLS modeling showed, after correcting for phylogenetic  
257 effects, the higher quantity and longer length of the longest mbCHC both affect desiccation resistance  
258 (interaction term, Female:  $t = 3.5$ ,  $P < 0.001$ ; Male:  $t = 2.2$ ,  $P = 0.03$ ) (**Table S3; Figure 6**). This suggests  
259 that the synthesis of mbCHCs with longer carbon-chain lengths could be a common mechanism  
260 underlying the evolution of higher desiccation resistance.

261

## 262 **Discussion**

263 Reducing evaporative water loss through the cuticle using a layer of CHCs is one of the most important  
264 evolutionary innovations in insects that allows many species to survive and thrive in diverse and arid  
265 habitats. We showed that CHC composition can account for 85.5% of the variation in desiccation  
266 resistance in the 50 *Drosophila* and related species in this study. This suggests that CHC composition  
267 may be highly predictive of desiccation resistance. Algorithmic ranking in importance of CHC components

268 using a random forest machine learning model showed that mbCHCs have the highest contribution to  
269 determining desiccation resistance. Importantly, higher amounts of longer mbCHCs are important in  
270 desiccation resistance. This is consistent with previous studies showing that mbCHC has higher melting  
271 temperature than the other commonly present types of CHCs (monoene and diene) and longer CHC  
272 leads to higher melting temperature (Gibbs and Pomonis, 1995). This is also experimentally supported by  
273 the synthetic CHC coating experiments where coating of longer mbCHCs confers higher desiccation  
274 resistance.

275 Previous studies showed support for mbCHCs in desiccation resistance in *Drosophila*. RNAi  
276 knockdown of a methyl-branched specific fatty acid synthase (*mFAS*) in *D. serrata* eliminates almost all  
277 mbCHCs and leads to significant decrease in desiccation resistance which could be partially rescued with  
278 synthetic mbCHCs (Chung *et al.*, 2014). Its sibling species, the rainforest desiccation sensitive *D. birchii*,  
279 have only trace amounts of mbCHCs (Howard *et al.*, 2003) and is unable to evolve desiccation resistance  
280 despite strong laboratory selection over many generations (Hoffmann *et al.*, 2003). The presence of  
281 mbCHCs in most *Drosophila* and related species leads to another question: Is this a general rule for  
282 insects using mbCHCs to develop desiccation resistance? A high proportion of very-long-chain mbCHCs  
283 with a single methyl branch have been reported in many insect species from different taxa that dwell in  
284 desert environments, such as the desert tenebrionid beetle *Eleodes armata* (Hadley, 1977), the desert  
285 ants *Cataglyphis niger* and *Pogonomyrmex barbatus* (Johnson and Gibbs, 2004; Soroker and Hefetz,  
286 2000), and the desert locust *Schistocerca gregaria* (Heifetz *et al.*, 1998). Although a small proportion of *n*-  
287 alkanes was also reported in some of these species, this suggests the use of mbCHCs to minimize water  
288 evaporation may be a common mechanism for insects in extremely dry environments.

289 Why are *n*-alkanes, which have the highest melting temperature and potentially better water  
290 proofing properties, not prevalent in species in our studies? A hypothesis that could explain this is the  
291 competition on the common precursors between the synthesis of linear unsaturated CHCs (monoenes  
292 and dienes) and *n*-alkanes. In insects, the synthesis of all CHCs start from the fatty acyl CoA synthesis  
293 pathway. The pathway is split where a cytosolic Fatty Acid Synthase (cFAS) will synthesize all the linear  
294 CHCs (alkanes, monoenes, dienes), while mFAS will synthesize mbCHCs (**Figure S9**) (Chung and  
295 Carroll, 2015; Holze *et al.*, 2021). The pathway suggests that the synthesis of alkanes, monoenes, and  
296 dienes are in competition. As many monoenes and dienes function in *Drosophila* as contact pheromones  
297 in regulating different behaviors such as mating and aggression (Blomquist and Ginzl, 2021; Chertemps  
298 *et al.*, 2007; Chertemps *et al.*, 2006; Chung and Carroll, 2015; Krupp *et al.*, 2008; Wang *et al.*, 2011), the  
299 synthesis for these CHCs may compete with the synthesis of *n*-alkanes. In contrast, the synthesis of  
300 mbCHCs is in another part of the pathway. This suggests that there are potential constraints in the roles  
301 of *n*-alkanes in desiccation resistance in *Drosophila* due to competition with CHCs which function as  
302 signaling molecules, while the synthesis of mbCHCs is relatively unaffected by other products of the  
303 pathway (**Figure S10**) (Chung and Carroll, 2015). We speculate that in *Drosophila* and related species,

304 the use of mbCHCs for modulating desiccation resistance may avoid the conflict between surviving  
305 desiccation and chemical signaling.

306 If there are no biosynthetic constraints to the synthesis of mbCHCs, would the evolution of longer  
307 mbCHCs be a general mechanism in the evolution of higher desiccation for species adapting to more arid  
308 climates? We suggest that this may be the case for many species, but for some species that use the  
309 shorter mbCHCs such as 2MeC26 and 2MeC28 as signaling molecules, such as *D. serrata* (Chenoweth  
310 and Blows, 2005; Chung *et al.*, 2014) and the longhorned beetle, *Mallodon dasystemus* (Spikes *et al.*,  
311 2010), natural selection and sexual selection may have opposing effects on the lengths of these mbCHCs.  
312 Indeed, the evolution of longer CHCs can have a sexually antagonistic effect on desiccation and mating  
313 success (Rusuwa *et al.*, 2022).

314 Ancestral trait reconstruction showed that the derived ancestral status for mbCHCs in the  
315 *Drosophila* genus are 2MeC28 and 2MeC30 as the major mbCHCs (**Figure S8**). As there are many  
316 extant species that do not have 2MeC30, this suggests that the ability to synthesize longer mbCHCs may  
317 be lost during evolution, especially for species that do not inhabit arid environments and have low levels  
318 of desiccation resistance such as *D. melanogaster* and *D. biarmipes*. On the contrary, for species that  
319 dwell in extremely arid environments such as *D. mojavensis* and *D. arizonae*, higher quantities of  
320 2MeC30 and an even longer mbCHC, 2MeC32, are observed. The observation is consistent with the  
321 results from our PGLS modeling, showing significant correlation between having higher quantity of longer  
322 mbCHCs and higher desiccation resistance in the *Drosophila* genus. In summary, we suggest that the  
323 synthesis of mbCHCs with longer carbon-chain lengths could be a common mechanism underlying the  
324 evolution of higher desiccation resistance.

325

326

## 327 **Materials and Methods**

### 328 ***Drosophila* species**

329 In this study, 46 *Drosophila* species, as well as three *Scaptodrosophila* species and one *Chymomyza*  
330 species were either obtained from the National Drosophila Species Stock Center (NDSSC) or were gifts  
331 from various colleagues. Details are listed in **Table S4**. All species were reared on standard cornmeal  
332 medium (Flystuff 66-121 Nutri-Fly<sup>®</sup> Bloomington Formulation). The phylogeny of all 50 species in this  
333 study was obtained from Finet *et al.* (2021).

### 334 **Experimental design**

335 To investigate the contribution of cuticular hydrocarbons to desiccation resistance, a cohort-based design  
336 was used. For each species, five to six cohorts were established and three measurements were  
337 conducted for each sex of the F1 progeny, including desiccation resistance, cuticular hydrocarbons, and  
338 body weight (**Figure 1**). Each cohort was treated as a biological replicate. Each cohort in each species  
339 was established by pooling five females and five males on a standard cornmeal medium in the



340 environmental chambers set at 25°C and a 12L:12D photoperiod. To maximize the food and spatial  
341 availability and minimize competition between the F1 progenies (Mueller, 1988), the parent flies in each  
342 cohort were transferred to fresh food after 5 days. F1 progeny flies were collected daily following  
343 emergence, separated by sex, and maintained on fresh cornmeal medium. All flies used for  
344 measurements were four- to five-days-old.

345

#### 346 **Desiccation resistance assays**

347 Desiccation resistance assays were performed in a randomized and blinded manner with the setup  
348 consistent with a previously published protocol (**Figure 1**) (Chung *et al.*, 2014). Briefly, in each cohort, ten  
349 adults of the same sex were subjected to the assay setup containing 10 grams of silica gel (S7500-1KG,  
350 Sigma-Aldrich<sup>®</sup>, St. Louis, MO). After the assays were assembled, all the setups were randomly arranged  
351 with a number assigned. Mortality of the flies was recorded hourly after two hours. For each cohort, one  
352 vial was scored and the average time in hours until all flies died was recorded as desiccation resistance.  
353 All desiccation resistance assays were conducted in the same environmental chambers that rearing the  
354 flies at 25°C and 12L:12D photoperiod.

355

#### 356 **Cuticular hydrocarbon analyses**

357 Cuticular hydrocarbons (CHCs) were extracted and analyzed using GC-MS following previously published  
358 protocols (Lamb *et al.*, 2020; Savage *et al.*, 2021). Five flies of the same sex (four- to five-days-old) from  
359 each cohort were soaked for 10 min in 200 µl hexane containing hexacosane (C26; 25 ng/ul) as an  
360 internal standard. Extracts were directly analyzed by GC-MS (7890A, Agilent Technologies Inc., Santa  
361 Clara, CA) using a DB-17ht column (Agilent Technologies Inc., Santa Clara, CA). To identify the CHC  
362 composition, we first compared retention times and mass spectra to an authentic standard mixture (C7-  
363 C40) (Supelco<sup>®</sup> 49452-U, Sigma-Aldrich, St. Louis, MO) with CHC samples. The types of CHCs, including  
364 methyl-branched alkanes, monoenes, dienes, and trienes, were then identified by a combination of their  
365 specific fragment ions on the side of functional groups (methyl branch or double bonds), retention times  
366 relative to linear hydrocarbon standards, and the m/z value of the molecular ion. The position of methyl  
367 branch in mbCHCs was determined using the protocol described in Carlson *et al.* (1998), while the  
368 position of double bonds were not determined in this study. Each CHC peak was quantified using its  
369 comparison with the peak area of the internal standard (C26) and represented as nanogram per fly  
370 (ng/fly). Because we observed a biased integration of peak areas on longer CHCs in running the standard  
371 mixture (**Figure S10**), we corrected the peak areas of CHCs based on the carbon-chain lengths using the  
372 integration from the standard mixture.

373

#### 374 **Body weight measurement**



375 Body weight was incorporated in the data collection and analysis. The body weight was determined as  
376 the difference between the Eppendorf tube containing five to ten flies of the same sex and the same  
377 empty Eppendorf tube.

378

### 379 **Coating of synthetic compounds**

380 To coat each of synthetic mbCHCs on *D. melanogaster*, including 2MeC26, 2MeC28, and 2MeC30, we  
381 first added 200  $\mu$ L hexane containing 300 ng/ $\mu$ L of each mbCHC in a 2-mL glass vial and then used a  
382 nitrogen evaporator (BT1603 G-Biosciences<sup>®</sup>) to evaporate the hexane with only mbCHCs precipitate at  
383 the bottom of the vial. For the control group, we only added 200  $\mu$ L hexane without any mbCHC. After the  
384 hexane was evaporated, ten flies of the same sex were transferred into each vial, following shaking on a  
385 Vortex for 20 seconds on, 20 seconds off, and 20 seconds on. The flies were then directly subjected to  
386 desiccation assays. Synthetic mbCHCs were kindly provided by Dr. Jocelyn Millar (University of California,  
387 Riverside).

388

### 389 **Statistics**

390 All analyses were conducted in R (Version 4.1). Correlation analyses were conducted with Pearson's  
391 method using 'cor.test' function. The dependent variables were log-transformed to better conform with  
392 assumptions of normality. Variance in CHC beta diversity across desiccation resistance was determined  
393 using PERMANOVA using the 'vegan' package (Anderson *et al.*, 2006). The random forest regression  
394 analysis was performed using the 'ranger' and 'randomForest' packages (Liaw and Wiener, 2002; Wright  
395 and Ziegler, 2015). The random forest regression models were built using both Out Of Bag estimate and  
396 test/training sets (70:30 split). To determine how useful each CHC variable is in the prediction of  
397 desiccation resistance in the random forest regression analysis, the importance of top predictor CHCs  
398 was quantified using permutation importance (Altmann *et al.*, 2010). Desiccation resistance in flies coated  
399 with different mbCHCs were determined using one-way ANOVA at  $\alpha = 0.05$ . *Post hoc* comparison  
400 was further conducted using Tukey's method. The ancestral trait reconstruction and estimation of  
401 phylogenetic signal, Pagel's  $\lambda$ , for mbCHC composition and desiccation resistance was determined using  
402 'Phytools', 'Picante', and 'Rphylopars' packages (Goolsby *et al.*, 2017; Kembel *et al.*, 2010; Revell, 2012).  
403 The PGLS analysis was conducted using generalized least squares fit by maximum likelihood and the  
404 covariance structure between species was used under a Brownian motion process of evolution. The  
405 PGLS analyses were conducted using 'GLS' function in 'ape' package (Paradis and Schliep, 2019).

406

### 407 **ACKNOWLEDGEMENTS**

408 We thank Dr. Jocelyn Millar for guidance and advice, as well as the synthetic compounds used in this  
409 study. We also thank Ye Ma, Eliana Giannetti, and Taylor Hori for technical assistance, Yushan Zhang for  
410 assistance with figure visualization, and the National Drosophila Species Stock Center for fly stocks of

411 these different *Drosophila* species. This work is supported by a National Science Foundation grant  
412 (2054773) to H. Chung.

413

#### 414 **AUTHOR CONTRIBUTIONS**

415 Z.W. and H. Chung designed research; Z.W., J.P., H. Cong, and C.R. performed research; Z.W., J.R.,  
416 and M.L. analyzed data; Z.W. and H. Chung wrote the paper with input from other authors.

417

#### 418 **DATA ACCESSIBILITY.**

419 Data and code have been deposited in the Dryad Digital Repository at:

420

#### 421 **DECLARATION OF INTERESTS**

422 The authors declare no competing interests.

#### 423 **REFERENCES**

424

425 Altmann, A., Tološi, L., Sander, O., and Lengauer, T. (2010). Permutation importance: a corrected feature  
426 importance measure. *Bioinformatics* 26, 1340-1347.

427 Anderson, M.J., Ellingsen, K.E., and McArdle, B.H. (2006). Multivariate dispersion as a measure of beta  
428 diversity. *Ecol. Lett.* 9, 683-693.

429 Belsley, D.A., Kuh, E., and Welsch, R.E. (2005). *Regression diagnostics: Identifying influential data and*  
430 *sources of collinearity* (John Wiley & Sons).

431 Blomquist, G.J., and Ginzl, M.D. (2021). *Chemical Ecology, Biochemistry, and Molecular Biology of*  
432 *Insect Hydrocarbons*. *Annual Review of Entomology* 66, 45-60.

433 Buellesbach, J., Whyte, B.A., Cash, E., Gibson, J.D., Scheckel, K.J., Sandidge, R., and Tsutsui, N.D.  
434 (2018). Desiccation resistance and micro-climate adaptation: cuticular hydrocarbon signatures of different  
435 Argentine ant supercolonies across California. *Journal of chemical ecology* 44, 1101-1114.

436 Bujan, J., Yanoviak, S.P., and Kaspari, M. (2016). Desiccation resistance in tropical insects: causes and  
437 mechanisms underlying variability in a Panama ant community. *Ecology and evolution* 6, 6282-6291.

438 Carlson, D.A., Bernier, U.R., and Sutton, B.D. (1998). Elution patterns from capillary GC for methyl-  
439 branched alkanes. *Journal of Chemical Ecology* 24, 1845-1865.

440 Chen, N., Fan, Y.-L., Bai, Y., Li, X.-d., Zhang, Z.-F., and Liu, T.-X. (2016). Cytochrome P450 gene,  
441 *CYP4G51*, modulates hydrocarbon production in the pea aphid, *Acyrtosiphon pisum*. *Insect Biochem.*  
442 *Mol. Biol.* 76, 84-94.

443 Chen, N., Pei, X.J., Li, S., Fan, Y.L., and Liu, T.X. (2019). Involvement of integument-rich *CYP4G19* in  
444 hydrocarbon biosynthesis and cuticular penetration resistance in *Blattella germanica* (L.). *Pest*  
445 *management science*.

- 446 Chenoweth, S.F., and Blows, M.W. (2005). Contrasting mutual sexual selection on homologous signal  
447 traits in *Drosophila serrata*. *The American Naturalist* *165*, 281-289.
- 448 Chertemps, T., Duportets, L., Labeur, C., Ueda, R., Takahashi, K., Saigo, K., and Wicker-Thomas, C.  
449 (2007). A female-biased expressed elongase involved in long-chain hydrocarbon biosynthesis and  
450 courtship behavior in *Drosophila melanogaster*. *Proceedings of the National Academy of Sciences* *104*,  
451 4273-4278.
- 452 Chertemps, T., Duportets, L., Labeur, C., Ueyama, M., and Wicker-Thomas, C. (2006). A female-specific  
453 desaturase gene responsible for diene hydrocarbon biosynthesis and courtship behaviour in *Drosophila*  
454 *melanogaster*. *Insect Molecular Biology* *15*, 465-473.
- 455 Chiang, Y.N., Tan, K.J., Chung, H., Lavrynenko, O., Shevchenko, A., and Yew, J.Y. (2016). Steroid  
456 Hormone Signaling Is Essential for Pheromone Production and Oenocyte Survival. *PLoS Genet* *12*,  
457 e1006126.
- 458 Chown, S.L., Hoffmann, A.A., Kristensen, T.N., Angilletta Jr, M.J., Stenseth, N.C., and Pertoldi, C. (2010).  
459 Adapting to climate change: a perspective from evolutionary physiology. *Climate research* *43*, 3-15.
- 460 Chung, H., and Carroll, S.B. (2015). Wax, sex and the origin of species: Dual roles of insect cuticular  
461 hydrocarbons in adaptation and mating. *Bioessays* *37*, 822-830.
- 462 Chung, H., Loehlin, D.W., Dufour, H.D., Vaccarro, K., Millar, J.G., and Carroll, S.B. (2014). A single gene  
463 affects both ecological divergence and mate choice in *Drosophila*. *Science* *343*, 1148-1151.
- 464 Ferveur, J.-F., Cortot, J., Rihani, K., Cobb, M., and Everaerts, C. (2018). Desiccation resistance: effect of  
465 cuticular hydrocarbons and water content in *Drosophila melanogaster* adults. *PeerJ* *6*, e4318.
- 466 Finet, C., Kassner, V.A., Carvalho, A.B., Chung, H., Day, J.P., Day, S., Delaney, E.K., De Ré, F.C.,  
467 Dufour, H.D., and Dupim, E. (2021). DrosoPhyla: resources for drosophilid phylogeny and systematics.  
468 *Genome biology and evolution* *13*, evab179.
- 469 Freckleton, R.P., Harvey, P.H., and Pagel, M. (2015). Phylogenetic analysis and comparative data: a test  
470 and review of evidence. *The American Naturalist*.
- 471 Gibbs, A., and Pomonis, J.G. (1995). Physical properties of insect cuticular hydrocarbons: the effects of  
472 chain length, methyl-branching and unsaturation. *Comparative Biochemistry and Physiology Part B:*  
473 *Biochemistry and Molecular Biology* *112*, 243-249.
- 474 Gibbs, A.G. (1998). Water-proofing properties of cuticular lipids. *American Zoologist* *38*, 471-482.
- 475 Gibbs, A.G. (2002a). Lipid melting and cuticular permeability: new insights into an old problem. *Journal of*  
476 *Insect Physiology* *48*, 391-400.
- 477 Gibbs, A.G. (2002b). Water balance in desert *Drosophila*: lessons from non-charismatic microfauna.  
478 *Comparative Biochemistry and Physiology Part A: Molecular & Integrative Physiology* *133*, 781-789.
- 479 Gibbs, A.G., Chippindale, A.K., and Rose, M.R. (1997). Physiological mechanisms of evolved desiccation  
480 resistance in *Drosophila melanogaster*. *Journal of Experimental Biology* *200*, 1821-1832.
- 481 Gibbs, A.G., Fukuzato, F., and Matzkin, L.M. (2003). Evolution of water conservation mechanisms in  
482 *Drosophila*. *Journal of Experimental Biology* *206*, 1183-1192.
- 483 Gibbs, A.G., and Matzkin, L.M. (2001). Evolution of water balance in the genus *Drosophila*. *Journal of*  
484 *Experimental Biology* *204*, 2331-2338.

- 485 Gibbs, A.G., and Rajpurohit, S. (2010). Cuticular lipids and water balance. Insect hydrocarbons: biology,  
486 biochemistry, and chemical ecology, 100-120.
- 487 Goolsby, E.W., Bruggeman, J., and Ané, C. (2017). Rphylopars: fast multivariate phylogenetic  
488 comparative methods for missing data and within-species variation. *Methods in Ecology and Evolution* 8,  
489 22-27.
- 490 Grafen, A. (1989). The phylogenetic regression. *Philosophical Transactions of the Royal Society of*  
491 *London. B, Biological Sciences* 326, 119-157.
- 492 Hadley, N.F. (1977). Epicuticular lipids of the desert tenebrionid beetle, *Eleodes armata*: seasonal and  
493 acclimatory effects on composition. *Insect Biochemistry* 7, 277-283.
- 494 Hadley, N.F. (1994). *Water relations of terrestrial arthropods* (CUP Archive).
- 495 Heifetz, Y., Miloslavski, I., Aizenshtat, Z., and Applebaum, S.W. (1998). Cuticular surface hydrocarbons of  
496 desert locust nymphs, *Schistocerca gregaria*, and their effect on phase behavior. *Journal of chemical*  
497 *ecology* 24, 1033-1047.
- 498 Hoffmann, A., Hallas, R., Dean, J., and Schiffer, M. (2003). Low potential for climatic stress adaptation in  
499 a rainforest *Drosophila* species. *Science* 301, 100-102.
- 500 Hoffmann, A.A. (2010). Physiological climatic limits in *Drosophila*: patterns and implications. *Journal of*  
501 *Experimental Biology* 213, 870-880.
- 502 Hoffmann, A.A., and Weeks, A.R. (2007). Climatic selection on genes and traits after a 100 year-old  
503 invasion: a critical look at the temperate-tropical clines in *Drosophila melanogaster* from eastern Australia.  
504 *Genetica* 129, 133-147.
- 505 Holze, H., Schrader, L., and Buellesbach, J. (2021). Advances in deciphering the genetic basis of insect  
506 cuticular hydrocarbon biosynthesis and variation. *Heredity* 126, 219-234.
- 507 Hood, W.G., and Tschinkel, W.R. (1990). Desiccation resistance in arboreal and terrestrial ants.  
508 *Physiological Entomology* 15, 23-35.
- 509 Howard, R.W., Jackson, L.L., Banse, H., and Blows, M.W. (2003). Cuticular hydrocarbons of *Drosophila*  
510 *birchii* and *D. serrata*: identification and role in mate choice in *D. serrata*. *Journal of chemical ecology* 29,  
511 961-976.
- 512 Huang, J., Yu, H., Guan, X., Wang, G., and Guo, R. (2016). Accelerated dryland expansion under climate  
513 change. *Nature Climate Change* 6, 166.
- 514 Jezovit, J.A., Levine, J.D., and Schneider, J. (2017). Phylogeny, environment and sexual communication  
515 across the *Drosophila* genus. *Journal of Experimental Biology* 220, 42-52.
- 516 Johnson, R.A., and Gibbs, A.G. (2004). Effect of mating stage on water balance, cuticular hydrocarbons  
517 and metabolism in the desert harvester ant, *Pogonomyrmex barbatus*. *Journal of insect Physiology* 50,  
518 943-953.
- 519 Kellermann, V., Hoffmann, A.A., Overgaard, J., Loeschcke, V., and Sgrò, C.M. (2018). Plasticity for  
520 desiccation tolerance across *Drosophila* species is affected by phylogeny and climate in complex ways.  
521 *Proc. R. Soc. B* 285, 20180048.
- 522 Kellermann, V., Loeschcke, V., Hoffmann, A.A., Kristensen, T.N., Fløjgaard, C., David, J.R., Svenning,  
523 J.C., and Overgaard, J. (2012). Phylogenetic constraints in key functional traits behind species' climate

- 524 niches: patterns of desiccation and cold resistance across 95 *Drosophila* species. *Evolution* 66, 3377-  
525 3389.
- 526 Kembel, S.W., Cowan, P.D., Helmus, M.R., Cornwell, W.K., Morlon, H., Ackerly, D.D., Blomberg, S.P.,  
527 and Webb, C.O. (2010). Picante: R tools for integrating phylogenies and ecology. *Bioinformatics* 26,  
528 1463-1464.
- 529 Khallaf, M.A., Cui, R., Weißflog, J., Erdogmus, M., Svatoš, A., Dweck, H.K., Valenzano, D.R., Hansson,  
530 B.S., and Knaden, M. (2021). Large-scale characterization of sex pheromone communication systems in  
531 *Drosophila*. *Nature communications* 12, 1-14.
- 532 Koto, A., Motoyama, N., Tahara, H., McGregor, S., Moriyama, M., Okabe, T., Miura, M., and Keller, L.  
533 (2019). Oxytocin/vasopressin-like peptide inotocin regulates cuticular hydrocarbon synthesis and water  
534 balancing in ants. *Proceedings of the National Academy of Sciences* 116, 5597-5606.
- 535 Krupp, J.J., Kent, C., Billeter, J.-C., Azanchi, R., So, A.K.-C., Schonfeld, J.A., Smith, B.P., Lucas, C., and  
536 Levine, J.D. (2008). Social experience modifies pheromone expression and mating behavior in male  
537 *Drosophila melanogaster*. *Current Biology* 18, 1373-1383.
- 538 Krupp, J.J., Nayal, K., Wong, A., Millar, J.G., and Levine, J.D. (2020). Desiccation resistance is an  
539 adaptive life-history trait dependent upon cuticular hydrocarbons, and influenced by mating status and  
540 temperature in *D. melanogaster*. *Journal of Insect Physiology* 121, 103990.
- 541 Kühsel, S., Brückner, A., Schmelzle, S., Heethoff, M., and Blüthgen, N. (2017). Surface area–volume  
542 ratios in insects. *Insect Science* 24, 829-841.
- 543 Kwan, L., and Rundle, H.D. (2010). Adaptation to desiccation fails to generate pre-and postmating  
544 isolation in replicate *Drosophila melanogaster* laboratory populations. *Evolution: International Journal of*  
545 *Organic Evolution* 64, 710-723.
- 546 Lamb, A.M., Wang, Z., Simmer, P., Chung, H., and Wittkopp, P.J. (2020). ebony Affects Pigmentation  
547 Divergence and Cuticular Hydrocarbons in *Drosophila americana* and *D. novamexicana*. *Frontiers in*  
548 *Ecology and Evolution* 8. 10.3389/fevo.2020.00184.
- 549 Leeson, S.A., Kennington, W.J., Evans, T.A., and Simmons, L.W. (2020). Phenotypic plasticity but no  
550 adaptive divergence in cuticular hydrocarbons and desiccation resistance among translocated  
551 populations of dung beetles. *Evolutionary Ecology* 34, 929-944.
- 552 Li, F., Rane, R.V., Luria, V., Xiong, Z., Chen, J., Li, Z., Catullo, R.A., Griffin, P.C., Schiffer, M., and Pearce,  
553 S. (2022). Phylogenomic analyses of the genus *Drosophila* reveals genomic signals of climate adaptation.  
554 *Molecular Ecology Resources* 22, 1559-1581.
- 555 Liaw, A., and Wiener, M. (2002). Classification and regression by randomForest. *R news* 2, 18-22.
- 556 Lynch, M. (1991). Methods for the analysis of comparative data in evolutionary biology. *Evolution* 45,  
557 1065-1080.
- 558 Matzkin, L.M., Watts, T.D., and Markow, T.A. (2009). Evolution of stress resistance in *Drosophila*:  
559 interspecific variation in tolerance to desiccation and starvation. *Functional Ecology* 23, 521-527.
- 560 Menzel, F., Blaimer, B.B., and Schmitt, T. (2017). How do cuticular hydrocarbons evolve? Physiological  
561 constraints and climatic and biotic selection pressures act on a complex functional trait. *Proceedings of*  
562 *the Royal Society B: Biological Sciences* 284, 20161727.

- 563 Mueller, L.D. (1988). Density-dependent population growth and natural selection in food-limited  
564 environments: the *Drosophila* model. *The American Naturalist* *132*, 786-809.
- 565 Mundry, R. (2014). Statistical issues and assumptions of phylogenetic generalized least squares. In  
566 Modern phylogenetic comparative methods and their application in evolutionary biology, (Springer), pp.  
567 131-153.
- 568 Paradis, E., and Schliep, K. (2019). ape 5.0: an environment for modern phylogenetics and evolutionary  
569 analyses in R. *Bioinformatics* *35*, 526-528.
- 570 Qiu, Y., Tittiger, C., Wicker-Thomas, C., Le Goff, G., Young, S., Wajnberg, E., Fricaux, T., Taquet, N.,  
571 Blomquist, G.J., and Feyereisen, R. (2012). An insect-specific P450 oxidative decarbonylase for cuticular  
572 hydrocarbon biosynthesis. *Proceedings of the National Academy of Sciences* *109*, 14858-14863.
- 573 Rane, R.V., Pearce, S.L., Li, F., Coppin, C., Schiffer, M., Shirriffs, J., Sgrò, C.M., Griffin, P.C., Zhang, G.,  
574 and Lee, S.F. (2019). Genomic changes associated with adaptation to arid environments in cactophilic  
575 *Drosophila* species. *BMC genomics* *20*, 52.
- 576 Revell, L.J. (2012). phytools: an R package for phylogenetic comparative biology (and other things).  
577 *Methods in ecology and evolution*, 217-223.
- 578 Rouault, J.-D., Marican, C., Wicker-Thomas, C., and Jallon, J.-M. (2004). Relations between cuticular  
579 hydrocarbon (HC) polymorphism, resistance against desiccation and breeding temperature; a model for  
580 HC evolution in *D. melanogaster* and *D. simulans*. In *Drosophila melanogaster, Drosophila simulans: So*  
581 *Similar, So Different*, (Springer), pp. 195-212.
- 582 Rusuwa, B.B., Chung, H., Allen, S.L., Frentiu, F.D., and Chenoweth, S.F. (2022). Natural variation at a  
583 single gene generates sexual antagonism across fitness components in *Drosophila*. *Current Biology (in*  
584 *press)*.
- 585 Savage, B.A., Wang, Z., Chung, H., Masten, S., and Grieshop, M. (2021). An Ozonolysis Based Method  
586 and Applications for the Non-lethal Modification of Insect Cuticular Hydrocarbons. *Journal of Chemical*  
587 *Ecology*.
- 588 Sherwood, S., and Fu, Q. (2014). A drier future? *Science* *343*, 737-739.
- 589 Shi, H., Tian, H., Lange, S., Yang, J., Pan, S., Fu, B., and Reyer, C.P. (2021). Terrestrial biodiversity  
590 threatened by increasing global aridity velocity under high-level warming. *Proceedings of the National*  
591 *Academy of Sciences* *118*.
- 592 Soroker, V., and Hefetz, A. (2000). Hydrocarbon site of synthesis and circulation in the desert ant  
593 *Cataglyphis niger*. *Journal of Insect Physiology* *46*, 1097-1102.
- 594 Spikes, A.E., Paschen, M.A., Millar, J.G., Moreira, J.A., Hamel, P.B., Schiff, N.M., and Ginzl, M.D.  
595 (2010). First contact pheromone identified for a longhorned beetle (Coleoptera: Cerambycidae) in the  
596 subfamily Prioninae. *Journal of chemical ecology* *36*, 943-954.
- 597 Svetnik, V., Liaw, A., Tong, C., Culberson, J.C., Sheridan, R.P., and Feuston, B.P. (2003). Random forest:  
598 a classification and regression tool for compound classification and QSAR modeling. *Journal of Chemical*  
599 *Information and computer Sciences* *43*, 1947-1958.
- 600 Wang, L., Han, X., Mehren, J., Hiroi, M., Billeter, J.-C., Miyamoto, T., Amrein, H., Levine, J.D., and  
601 Anderson, D.J. (2011). Hierarchical chemosensory regulation of male-male social interactions in  
602 *Drosophila*. *Nature neuroscience* *14*, 757-762.



- 603 Wang, Y., Ferveur, J.F., and Moussian, B. (2021). Eco-genetics of desiccation resistance in *Drosophila*.  
604 *Biological Reviews*.
- 605 Wigglesworth, V.B. (1945). Transpiration through the cuticle of insects. *Journal of Experimental Biology*  
606 *London* 21, pp. 97-114.
- 607 Wright, M.N., and Ziegler, A. (2015). ranger: A fast implementation of random forests for high dimensional  
608 data in C++ and R. arXiv preprint arXiv:1508.04409.
- 609
- 610



611  
612 **FIGURE LEGENDS**

613  
614 **Figure 1. A cohort-based experimental design.** A cohort-based experimental design can facilitate  
615 determining the correlation between desiccation resistance, cuticular hydrocarbons (CHCs), and body  
616 weight. Five to six cohorts of each species was established.

617  
618 **Figure 2. Desiccation resistance and CHC composition in 46 *Drosophila* species and 4 outgroup**  
619 **species.** Desiccation resistance and CHC composition of each species were plotted together. Males and  
620 females are shown separately. The shading intensity of each species represents the number of hours of  
621 desiccation resistance, while the size and color of each circle represent the type of CHC and its quantity.  
622 *n*-alkanes are only present in some species from the melanogaster group.

623  
624 **Figure 3. Higher amounts of CHCs do not contribute to higher desiccation resistance. (A)** Body  
625 weight is positively correlated with desiccation resistance (Females:  $r = 0.4$ ,  $P < 0.001$ , Males:  $r = 0.5$ ,  $P <$   
626  $0.001$ ). **(B)** Total amount of CHCs is correlated with having higher body weight (Females:  $r = 0.7$ ,  $P <$   
627  $0.001$ , Males:  $r = 0.7$ ,  $P < 0.001$ ). **(C)** A weak positive correlation between desiccation resistance and  
628 CHCs as a percentage of body weight in females, while no correlation in males (Females:  $r = 0.1$ ,  $P =$   
629  $0.03$ , Males:  $P = 0.1$ ). All correlation analyses were conducted using Pearson's method.

630  
631 **Figure 4. CHC composition can be used to predict desiccation resistance (A)** Random Forest  
632 regression modeling of CHC abundance was able to explain 85.5% of the variation in time to desiccation  
633 with a Root Mean Square Error (RMSE) of 4.5. **(B)** The abundance of four mbCHCs, 2MeC30, 2MeC28,  
634 2MeC32, and 2MeC26 has the highest importance to the desiccation resistance in the random forest  
635 regression model, while most of CHCs have less contribution to the accuracy of the model for desiccation  
636 resistance.

637  
638 **Figure 5. Longer mbCHCs are associated with higher desiccation resistance. (A)** Quantity of  
639 2MeC26 is negatively correlated with desiccation resistance in males, but no correlation in females  
640 (Females:  $P = 0.1$ , Males:  $r = -0.4$ ,  $P < 0.001$ ). **(B)** Quantity of 2MeC28 is positively correlated with  
641 desiccation resistance (Females:  $r = 0.4$ ,  $P < 0.001$ , Males:  $r = 0.4$ ,  $P < 0.001$ ). **(C)** Quantity of 2MeC30 is  
642 positively correlated with desiccation resistance in females, but no correlation in males (Females:  $r = 0.2$ ,  
643  $P = 0.009$ , Males:  $P = 0.2$ ). **(D)** Quantity of 2MeC32 is positively correlated with desiccation resistance  
644 (Females:  $r = 0.3$ ,  $P < 0.001$ , Males:  $r = 0.4$ ,  $P < 0.001$ ). Correlations between the quantities of each  
645 mbCHC and desiccation resistance were determined using Pearson's method. **(E)** *D. melanogaster*  
646 coated with longer mbCHCs have higher desiccation resistance. Perfuming of synthetic mbCHCs on *D.*  
647 *melanogaster* showed that 2MeC26 does not influence desiccation resistance. 2MeC30 increases  
648 desiccation resistance in female *D. melanogaster* while both 2MeC28 and 2MeC30 in increases

649 desiccation resistance in *male D. melanogaster*. One-Way ANOVA showed significant differences  
650 between *D. melanogaster* flies coated with different mbCHCs (Female:  $F_{(3,189)} = 73.1$ ,  $P < 0.001$ , Male:  
651  $F_{(3,191)} = 23.7$ ,  $P < 0.001$ ). *Post hoc* comparison was conducted using Tukey's method.

652

653 **Figure 6. Evolution of longer mbCHCs are significantly correlated with evolution of higher**  
654 **desiccation resistance.** Patterns in the normalized quantities of the longest mbCHCs and desiccation  
655 resistance for females (top) and males (bottom) were listed across the phylogeny of the 50 *Drosophila*  
656 and related species. PGLS analysis between the longest mbCHCs and desiccation resistance showed  
657 both the higher quantity and longer length of the longest mbCHC affect desiccation resistance (interaction  
658 term, Female:  $t = 3.5$ ,  $P < 0.001$ ; Male:  $t = 2.2$ ,  $P = 0.03$ ).

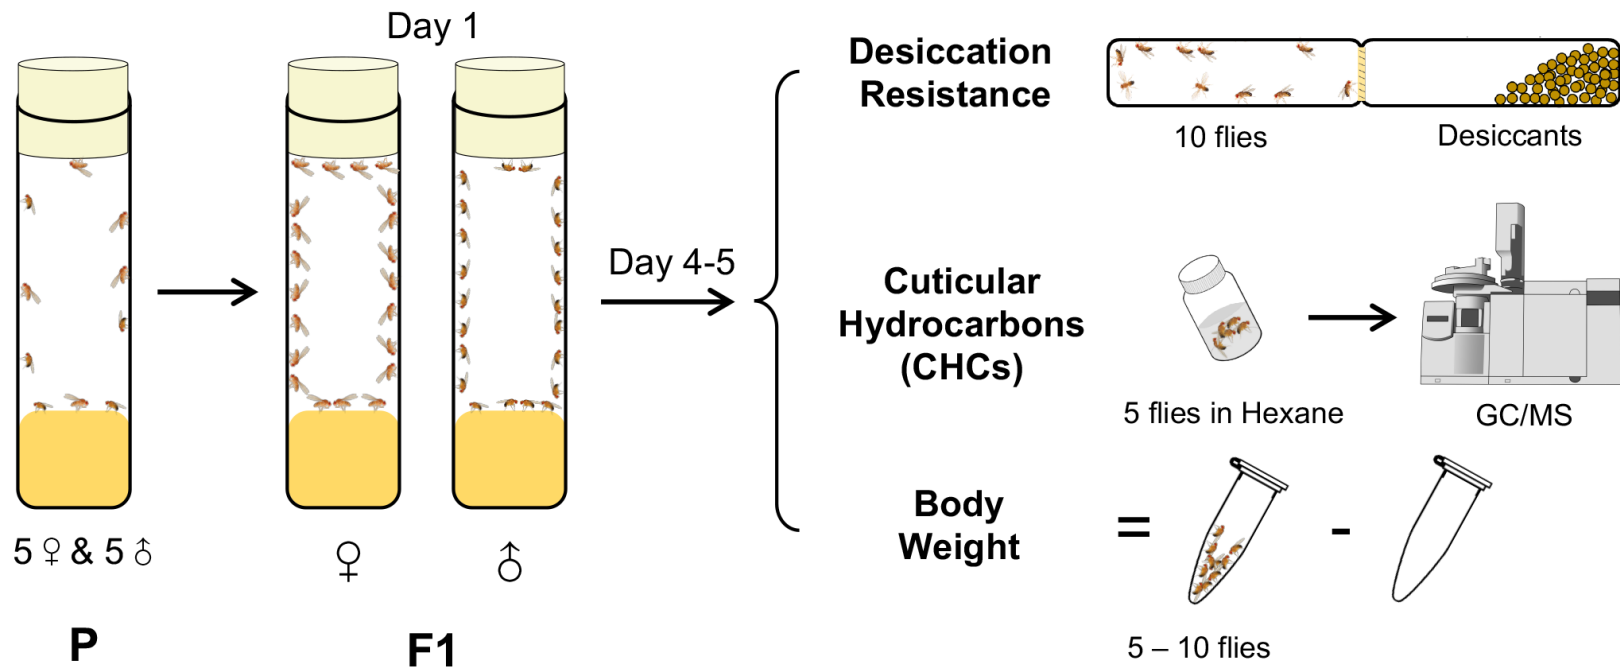

## Females

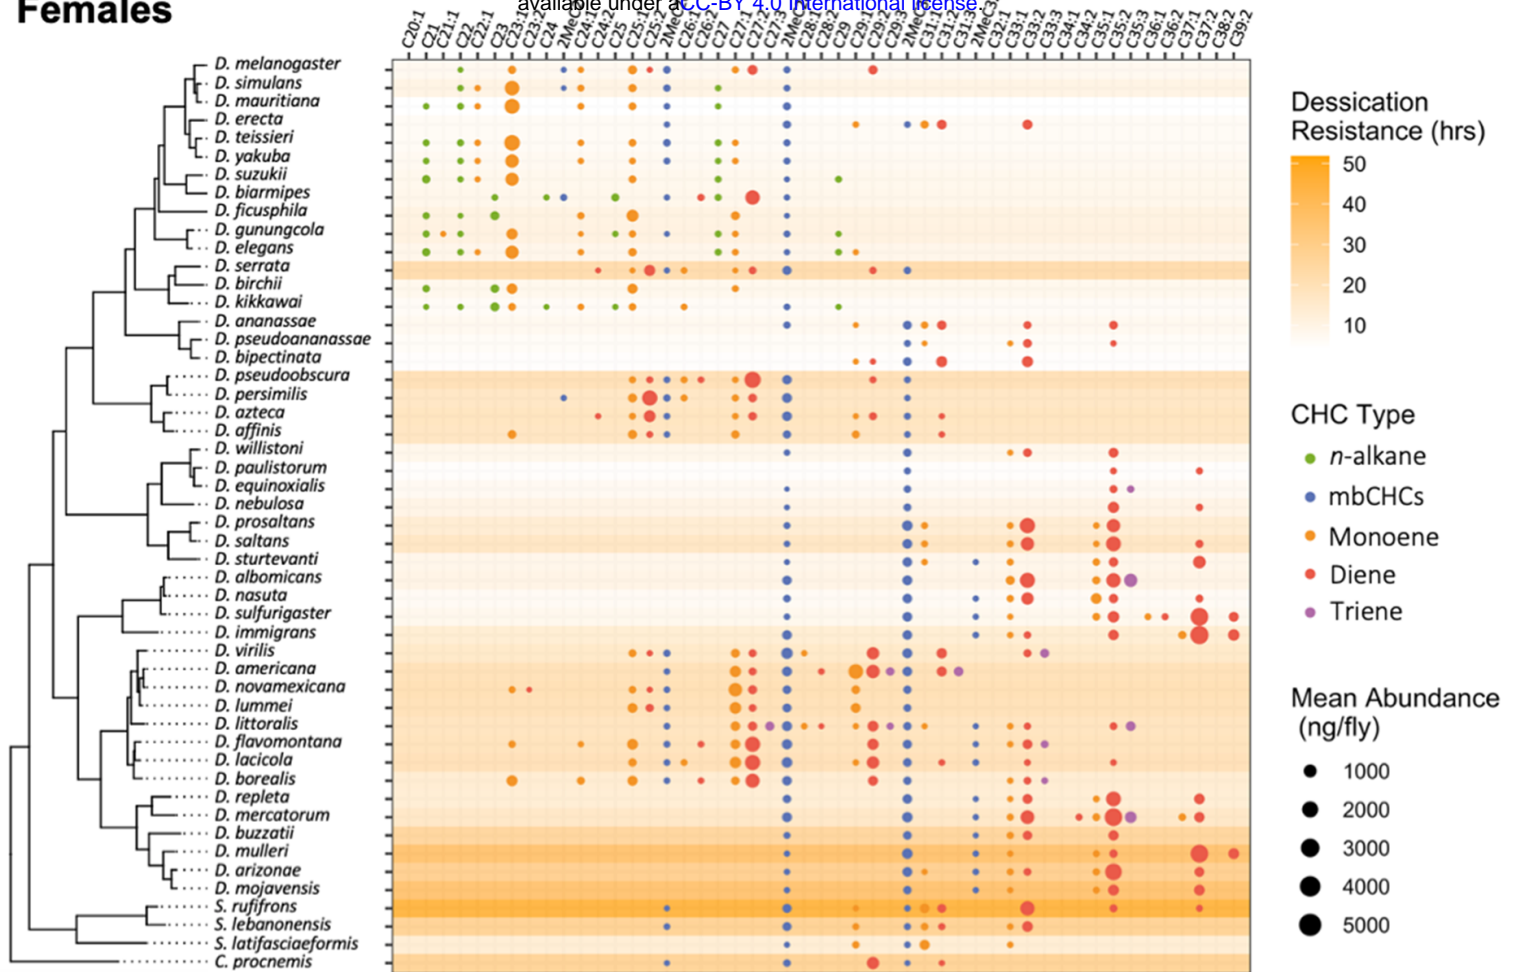

## Males

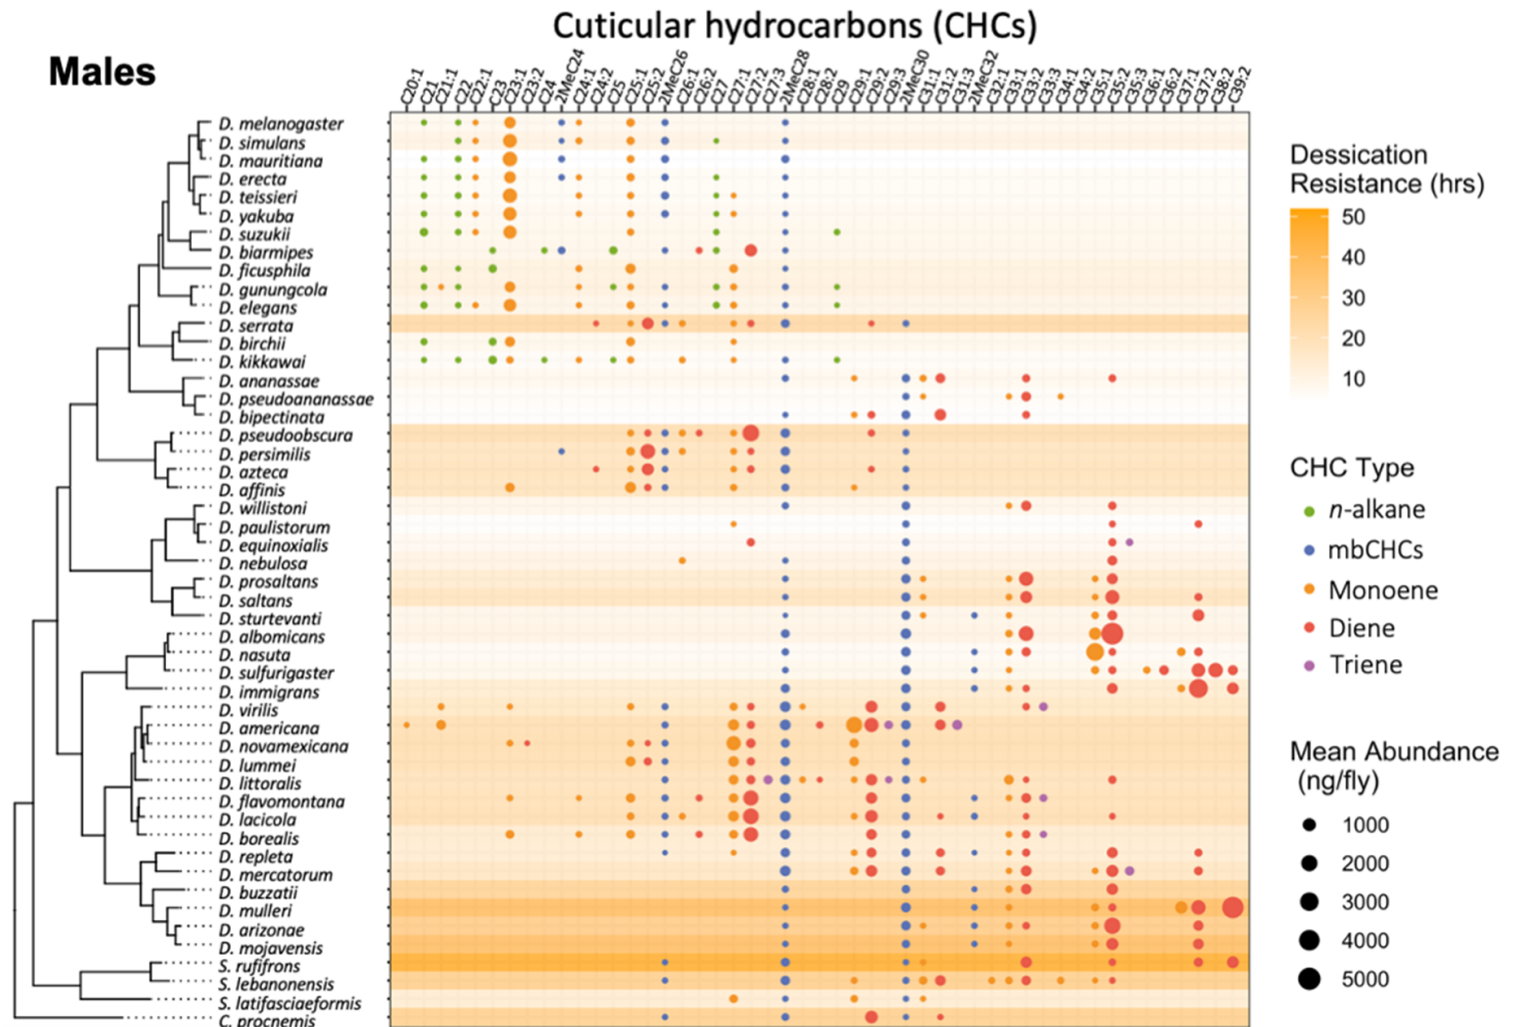

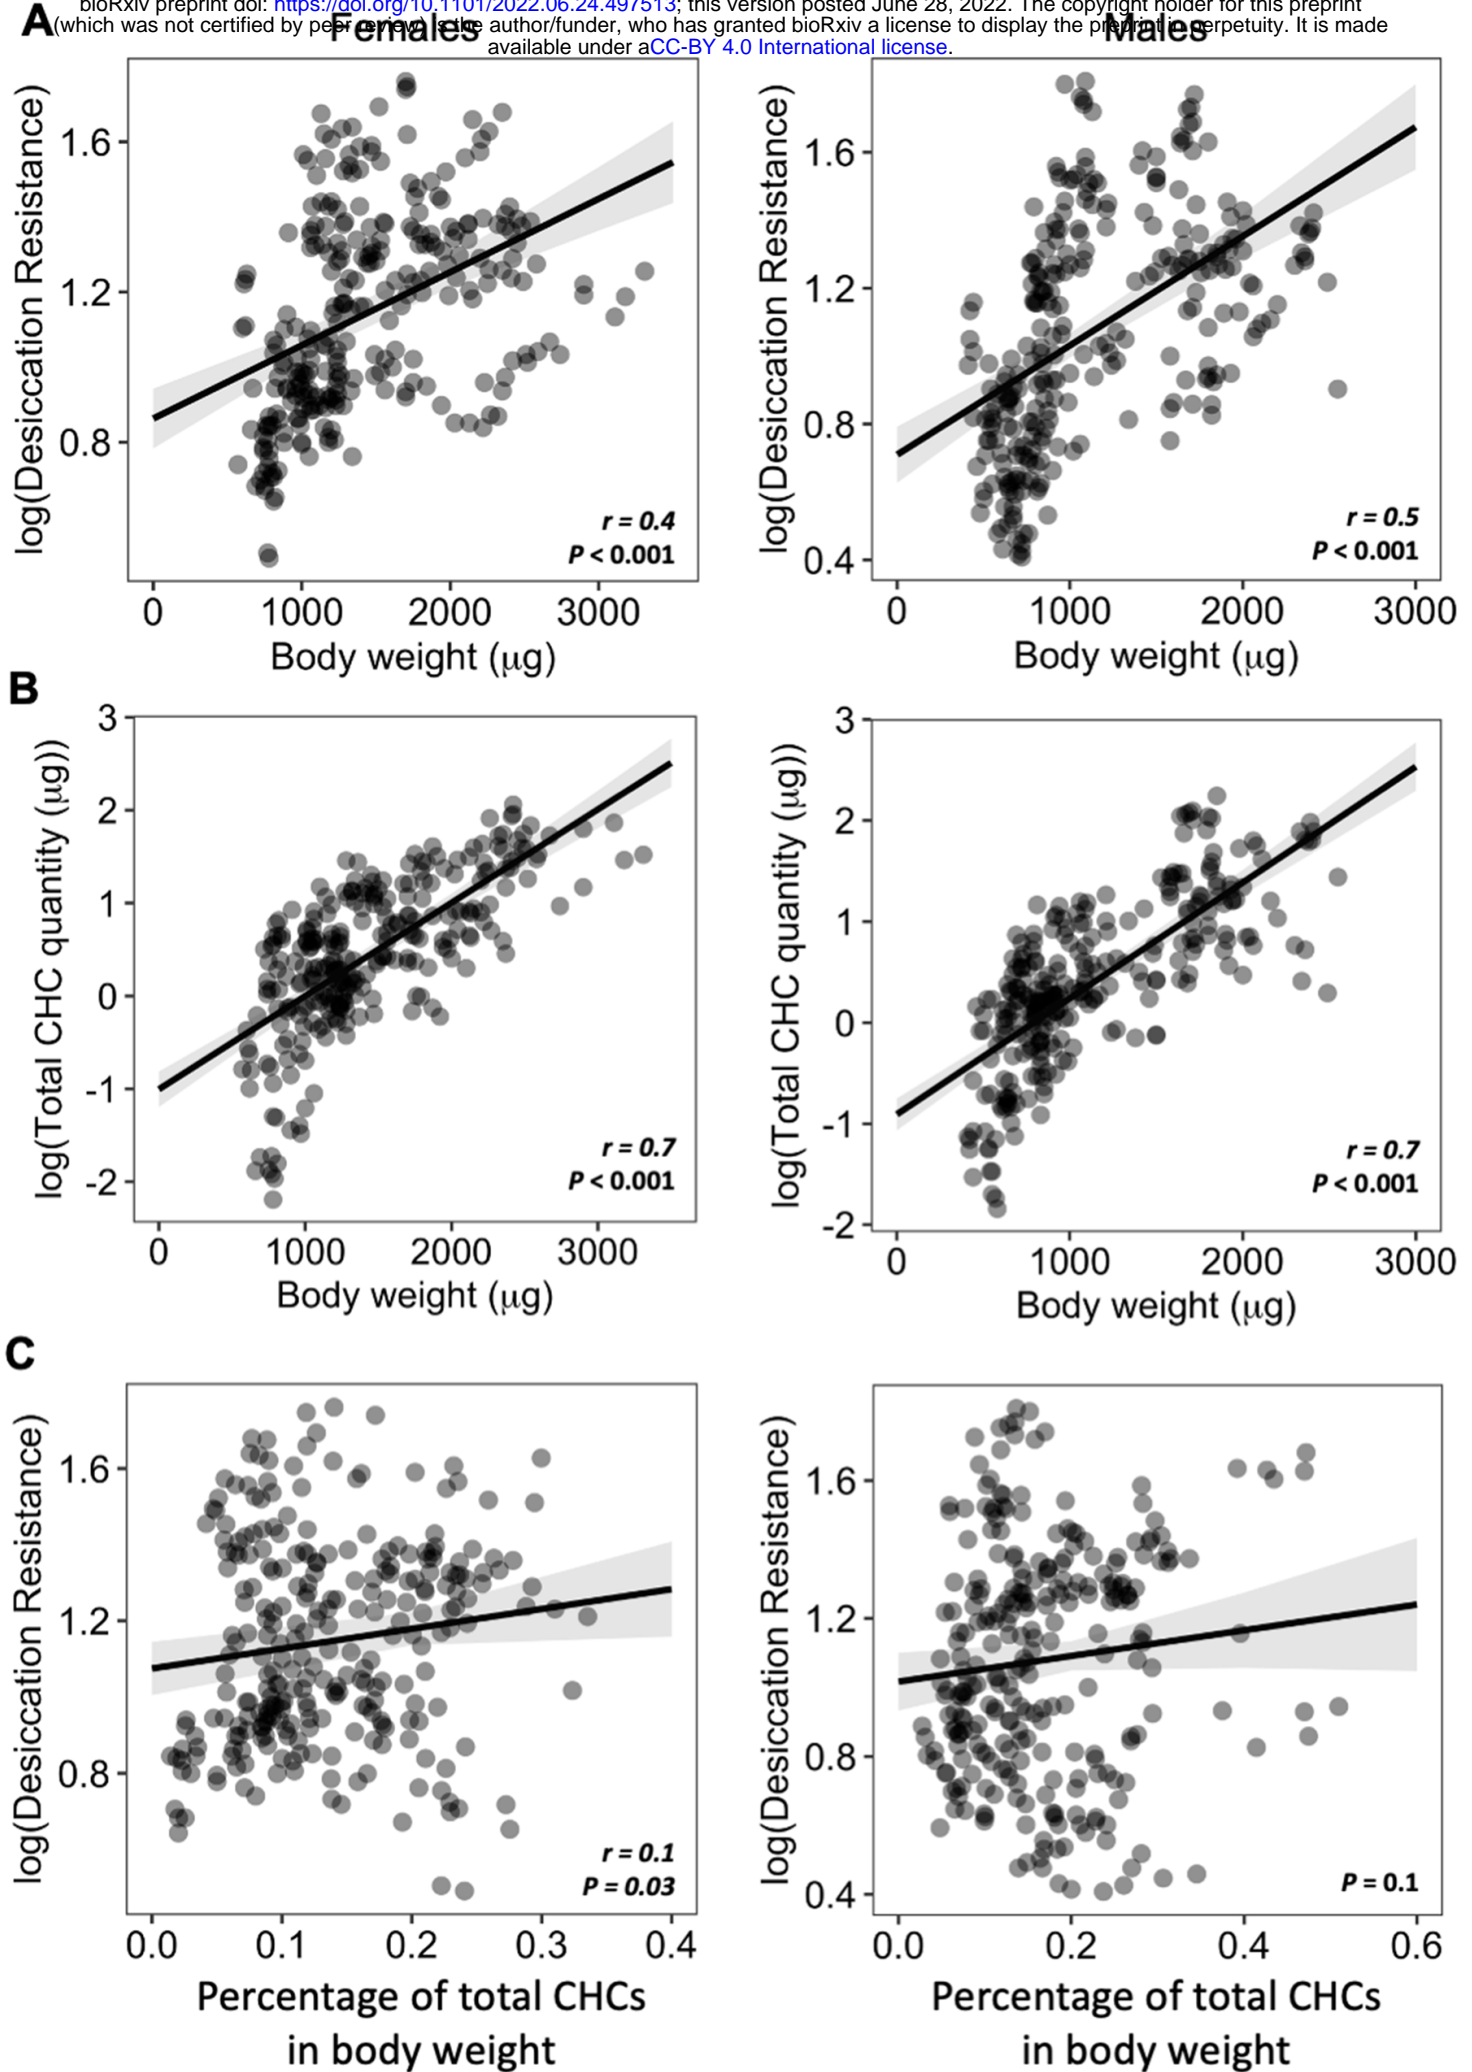

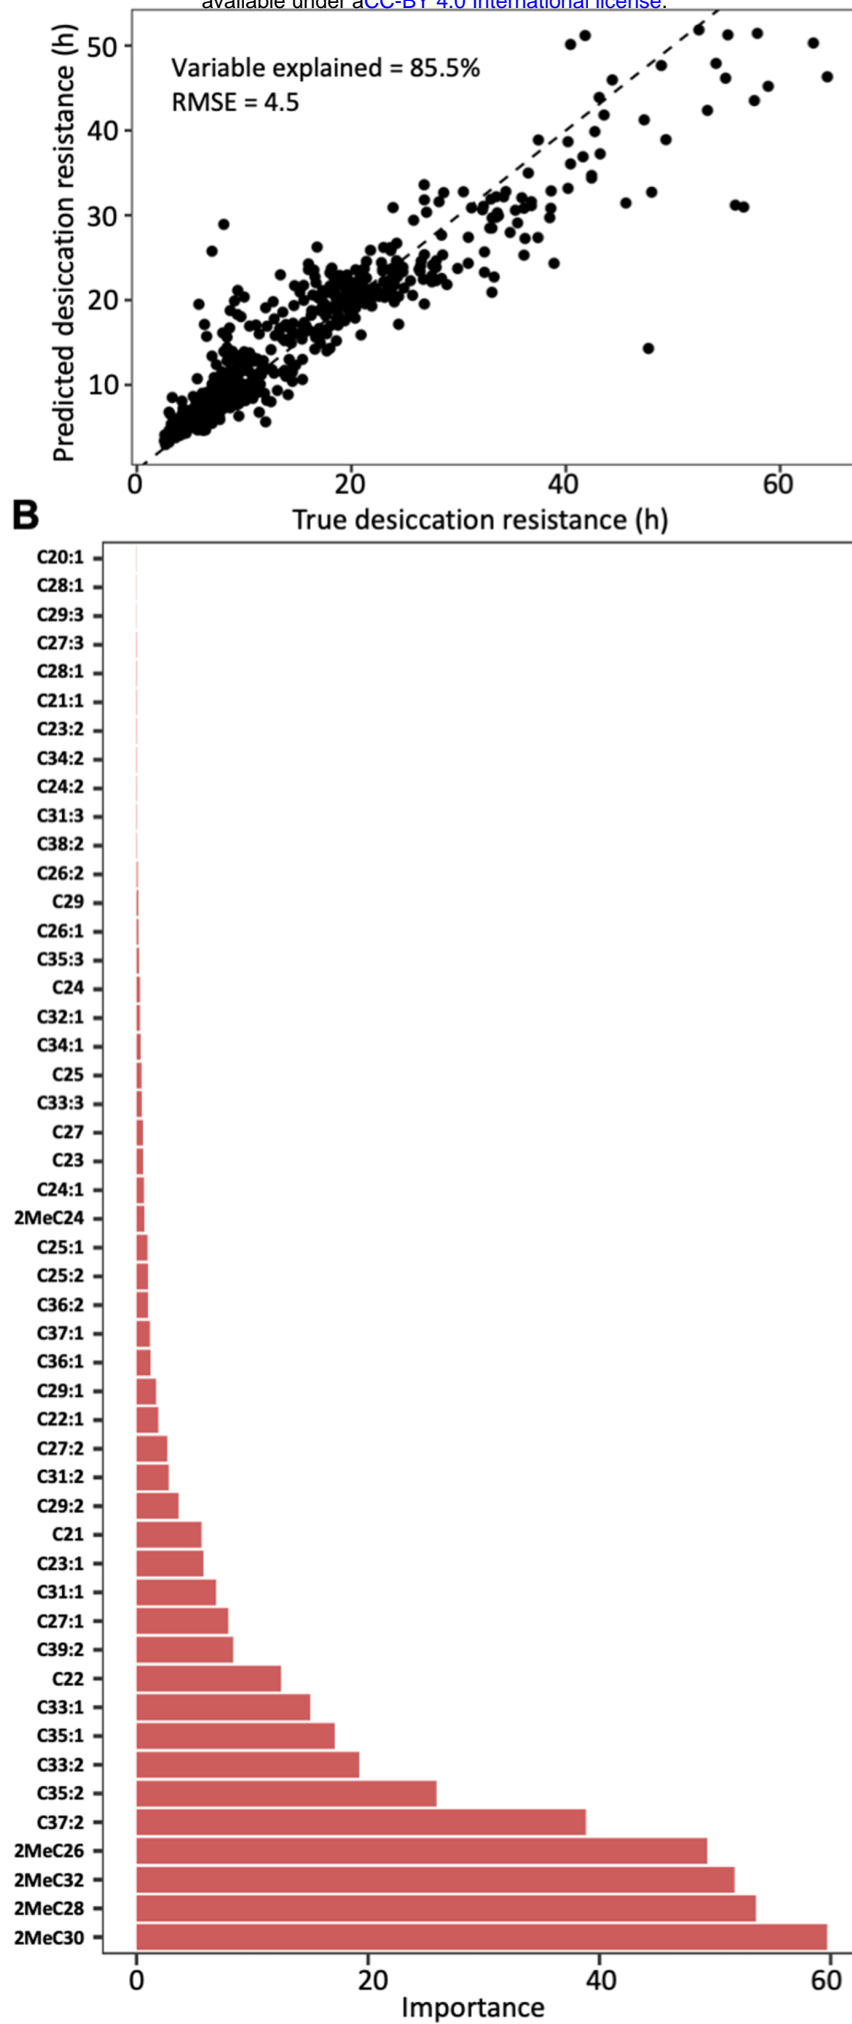



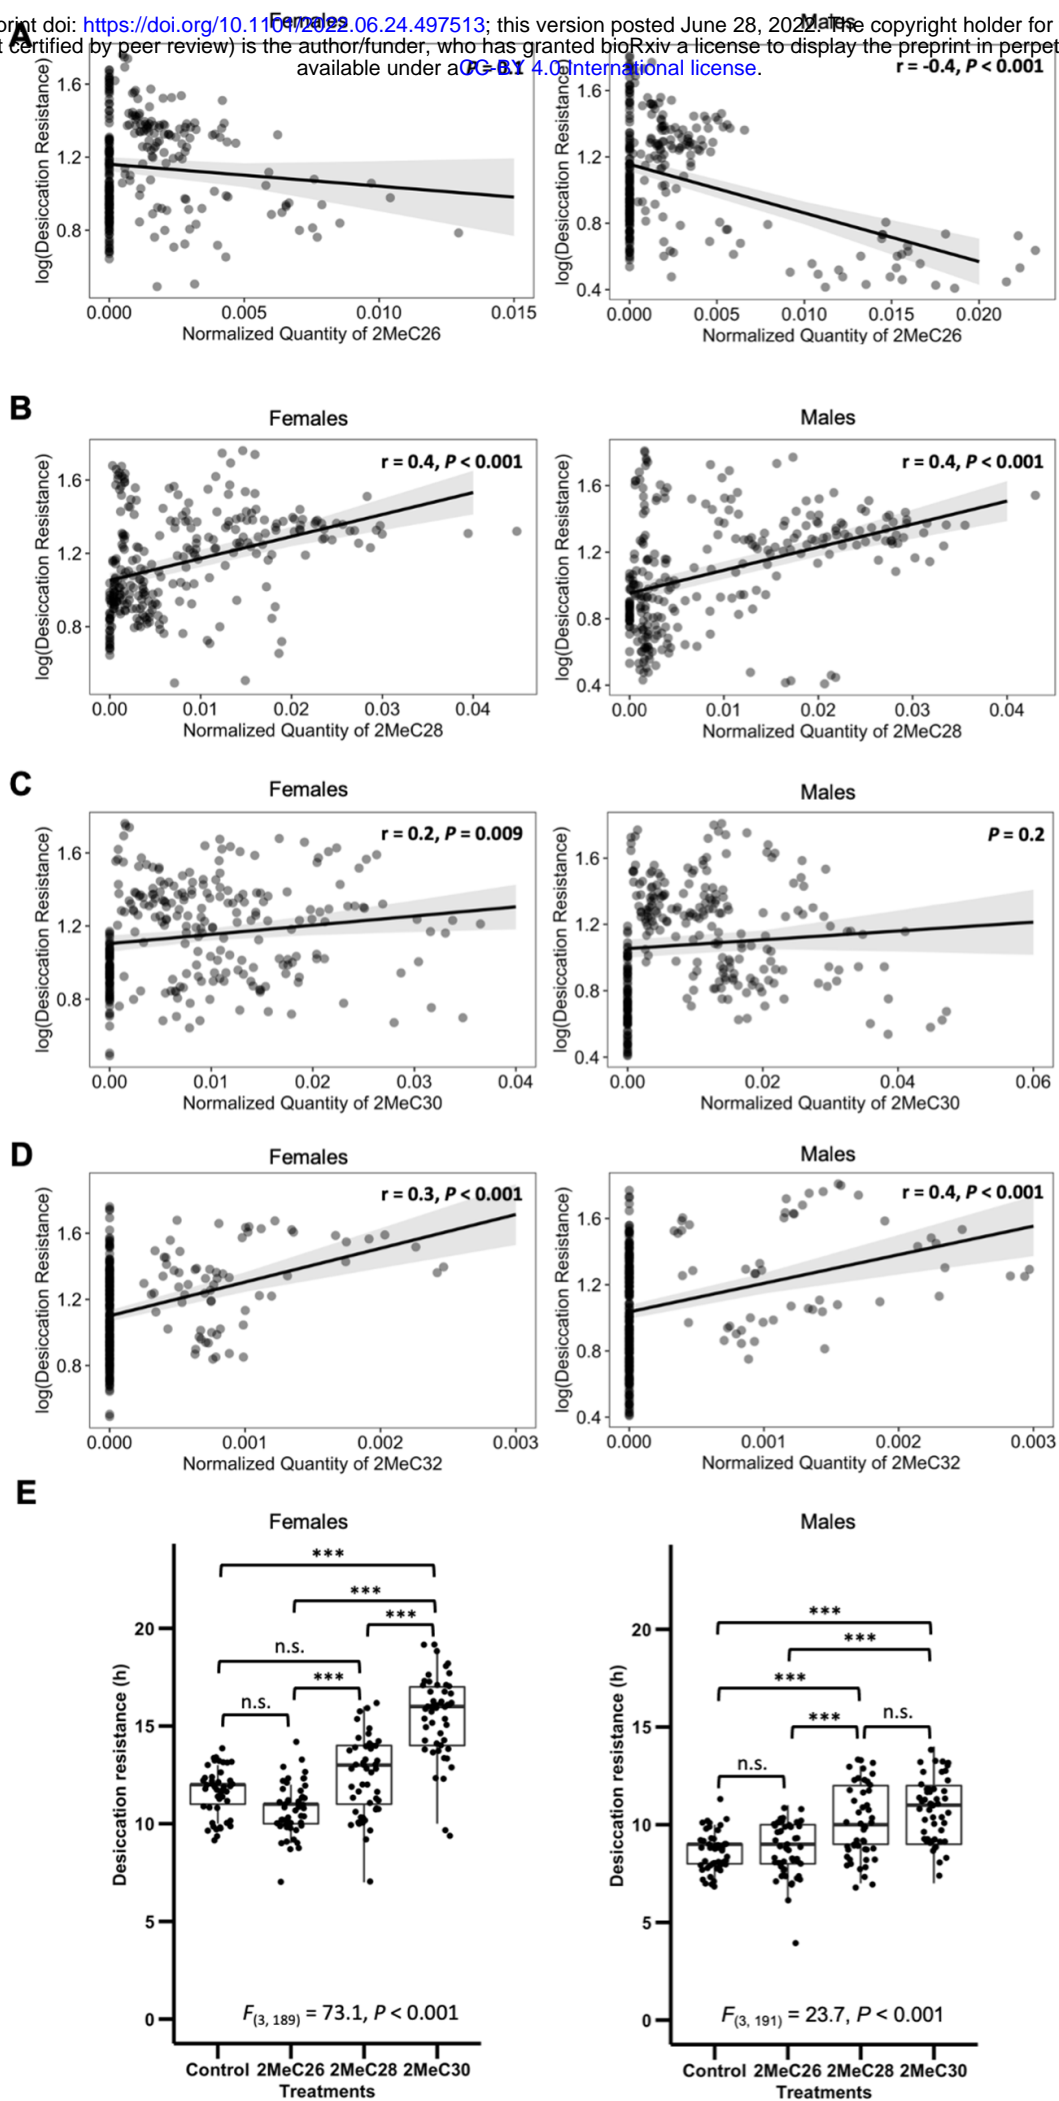



# Female

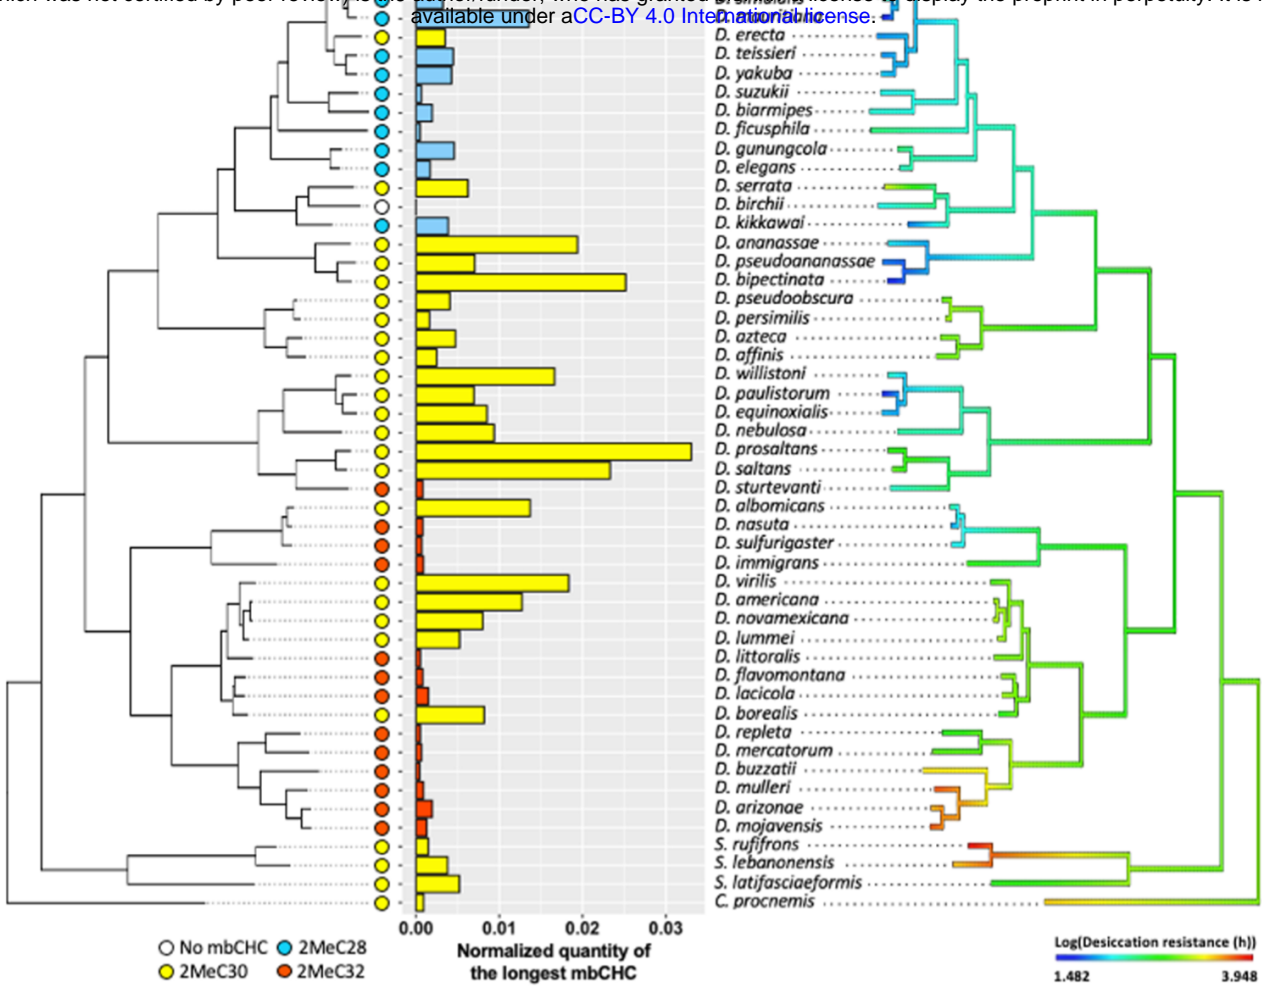

# Male

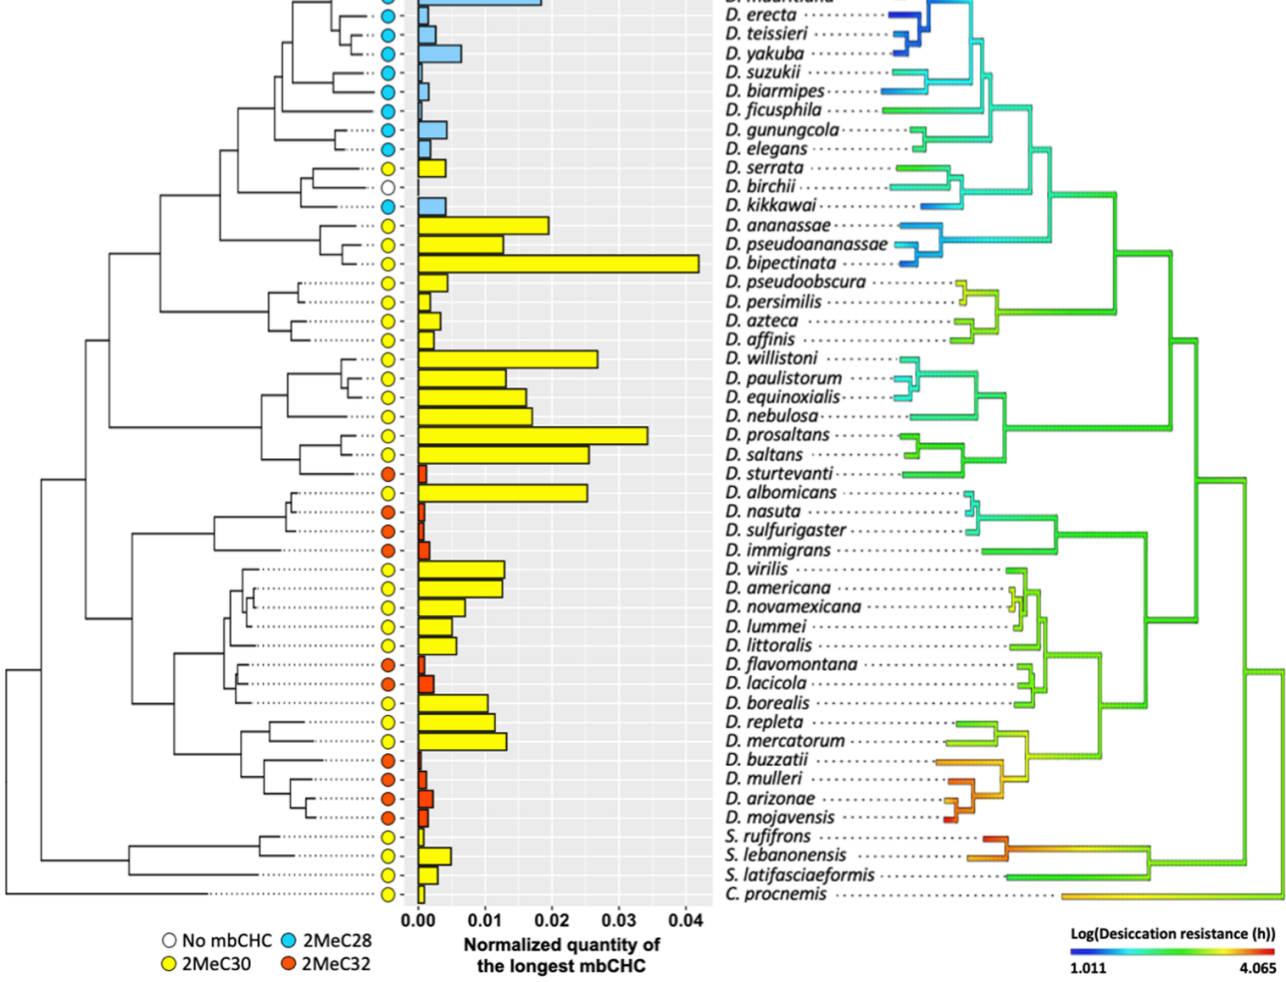

## Supplementary Data

# Desiccation resistance differences in *Drosophila* species can be largely explained by variation in cuticular hydrocarbons

bioRxiv preprint doi: <https://doi.org/10.1101/2022.06.24.497518>; this version posted June 28, 2022. The copyright holder for this preprint (which was not certified by peer review) is the author/funder, who has granted bioRxiv a license to display the preprint in perpetuity. It is made available under a [CC-BY 4.0 International license](#).

Zinan Wang, Joseph P. Receveur, Jian Pu, Haosu Cong, Cole Richards, Muxuan Liang, and Henry Chung

**Figure S1.** The phylogeny of 50 *Drosophila* and related species used in this study.

**Figure S2.** Desiccation resistance and body weight in 46 *Drosophila* species and 4 outgroup species.

**Figure S3.** The melting temperature of CHCs is determined by methyl group, double bonds and carbon chain length.

**Figure S4.** CHC quantity as a percentage of body weight.

**Figure S5.** The composition of CHCs significantly differed across the increasing desiccation resistance.

**Figure S6.** Cross-validation of the random forest regression model has a similar performance to the regression model using the full dataset.

**Figure S7.** Correlation between different mbCHCs in 50 *Drosophila* and related species.

**Figure S8.** Ancestral state reconstruction of mbCHC profiles for the *Drosophila* genus.

**Figure S9.** Pathway for the synthesis of branched CHCs (mbCHCs) and linear CHCs (*n*-alkanes, monoenes, dienes) .

**Figure S10.** Chromatogram of the authentic standard *n*-alkane mixture which contains 34 *n*-alkanes from C7 to C40 at the same concentration.

Figure S1

bioRxiv preprint doi: <https://doi.org/10.1101/2022.06.24.497513>; this version posted June 28, 2022. The copyright holder for this preprint (which was not certified by peer review) is the author/funder, who has granted bioRxiv a license to display the preprint in perpetuity. It is made available under aCC-BY 4.0 International license.

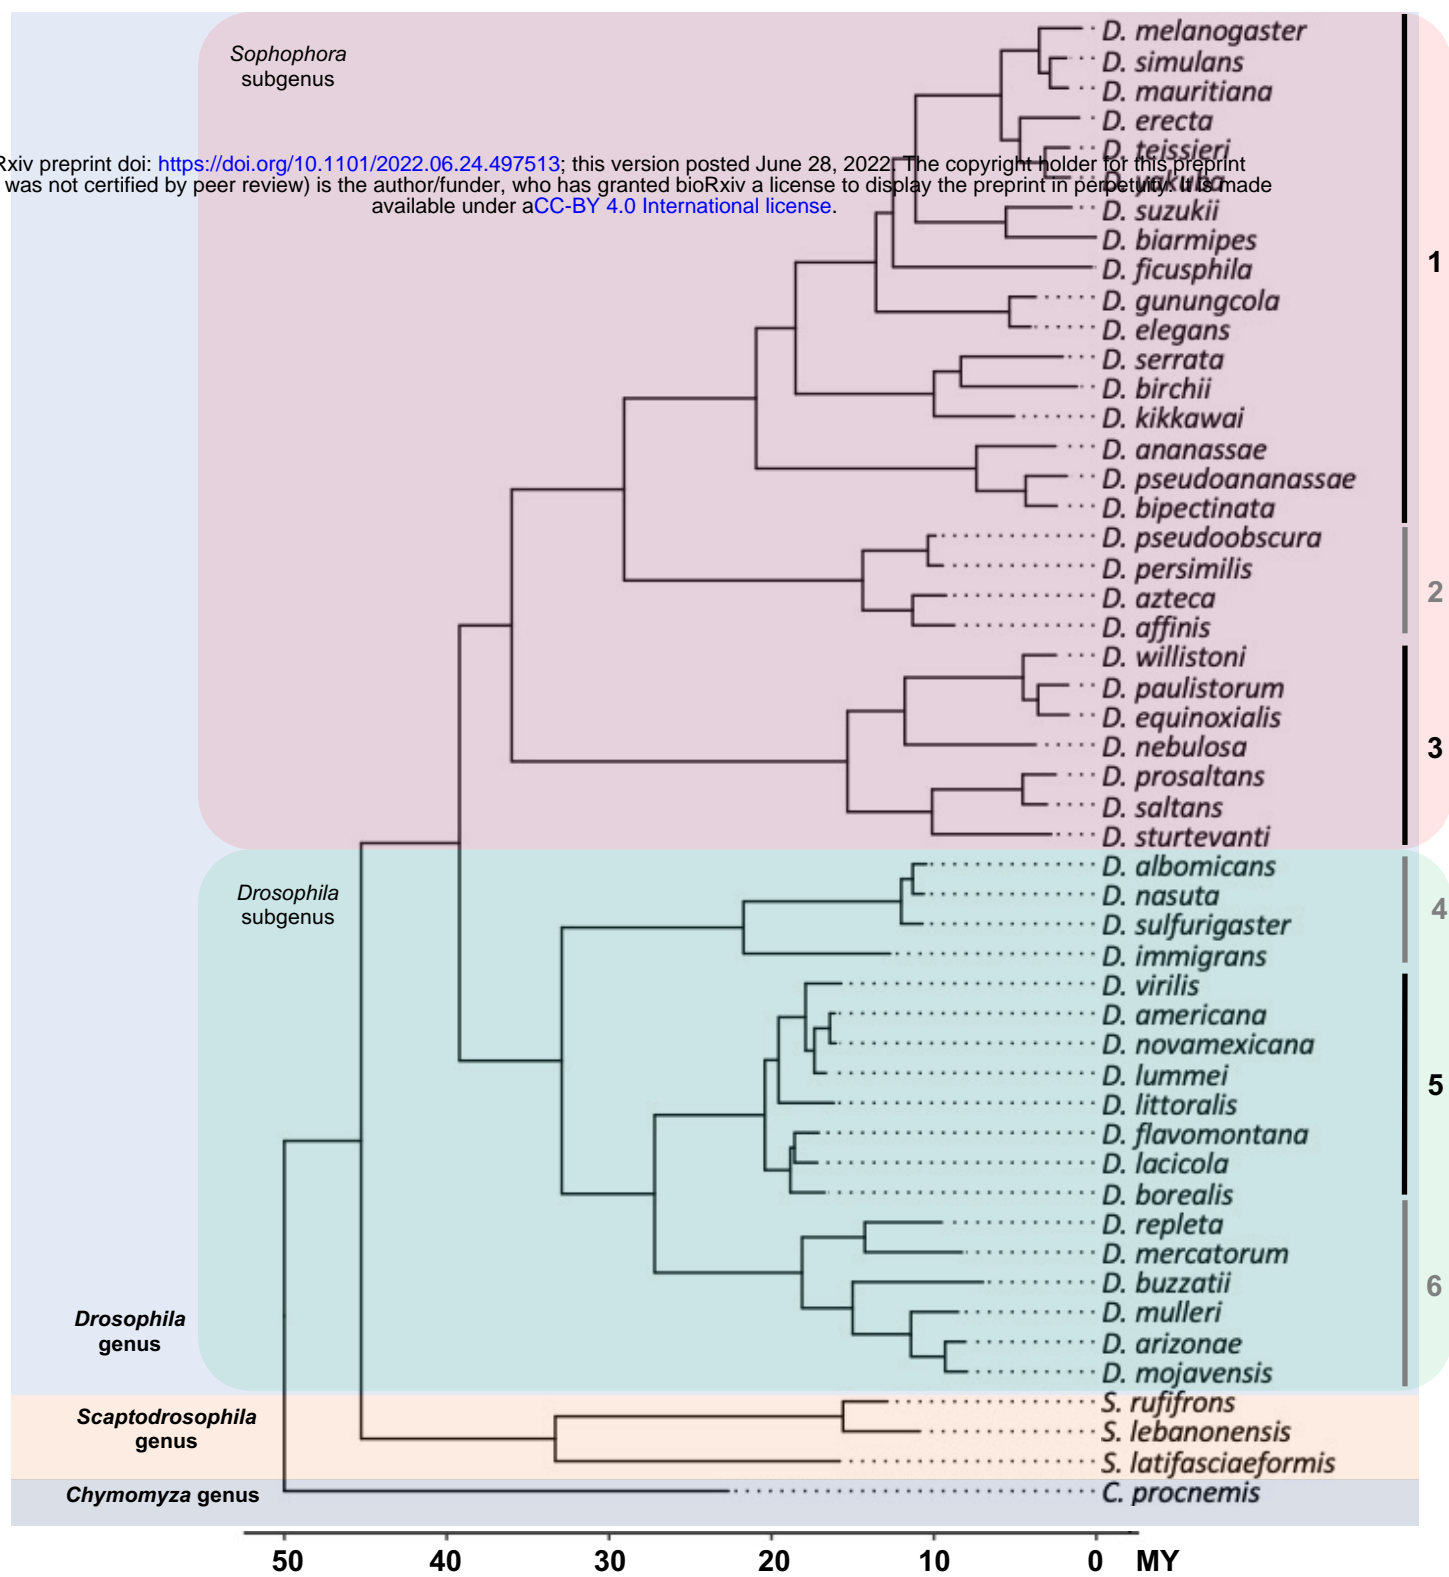

Figure S2

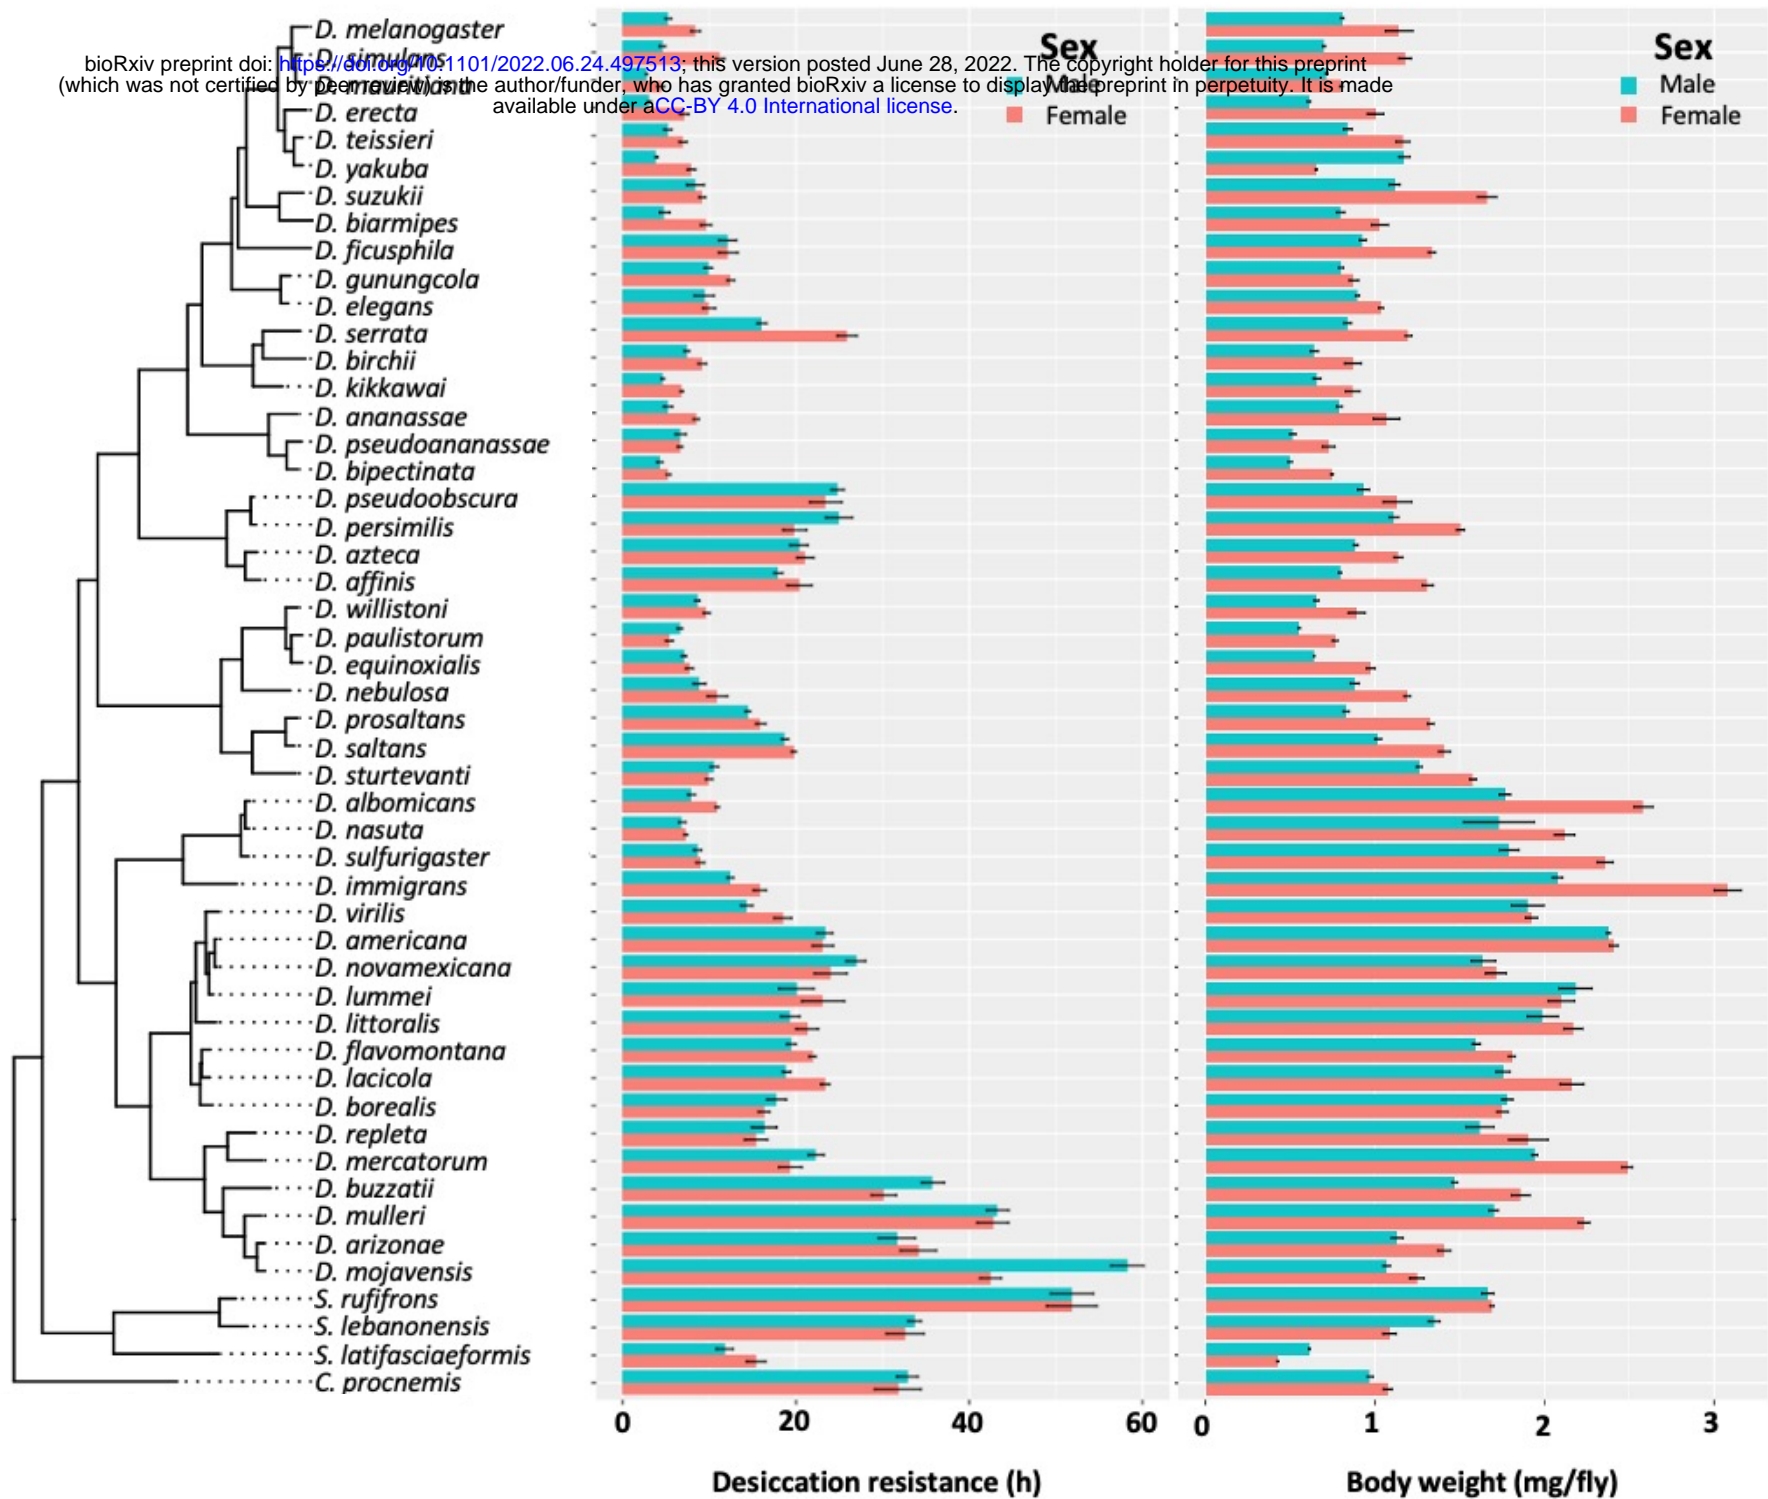

Figure S3

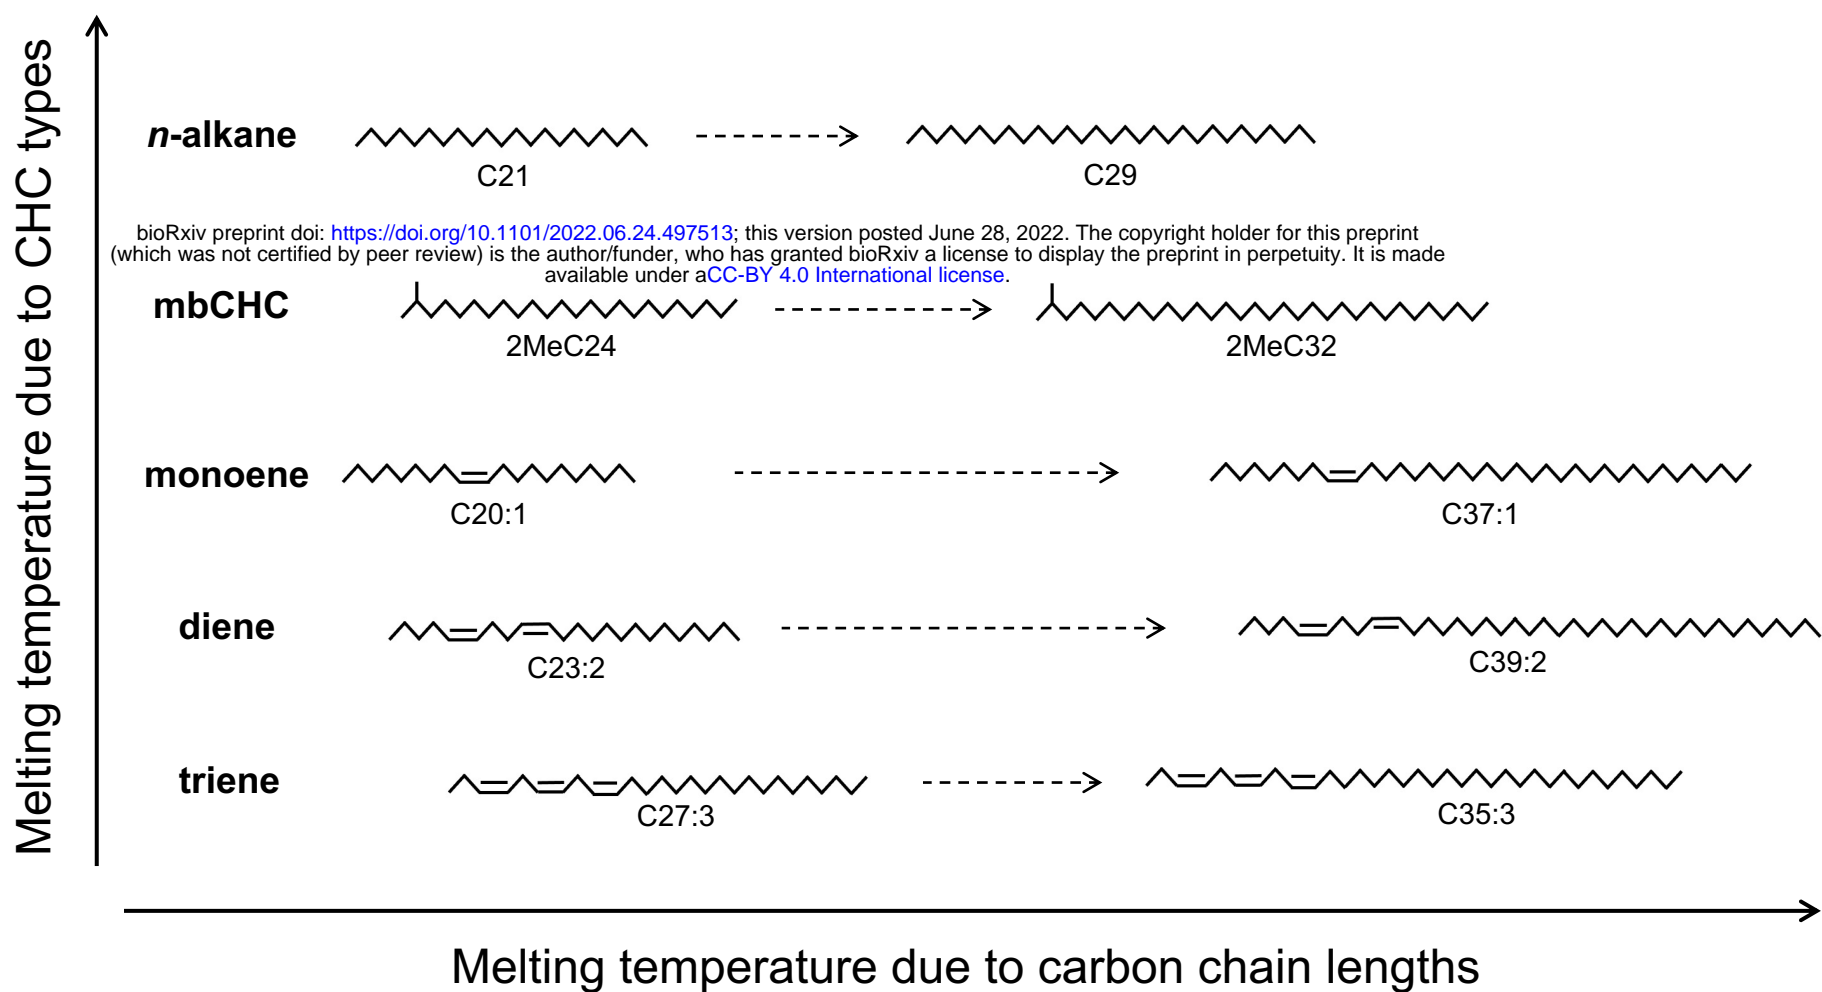



Figure S4

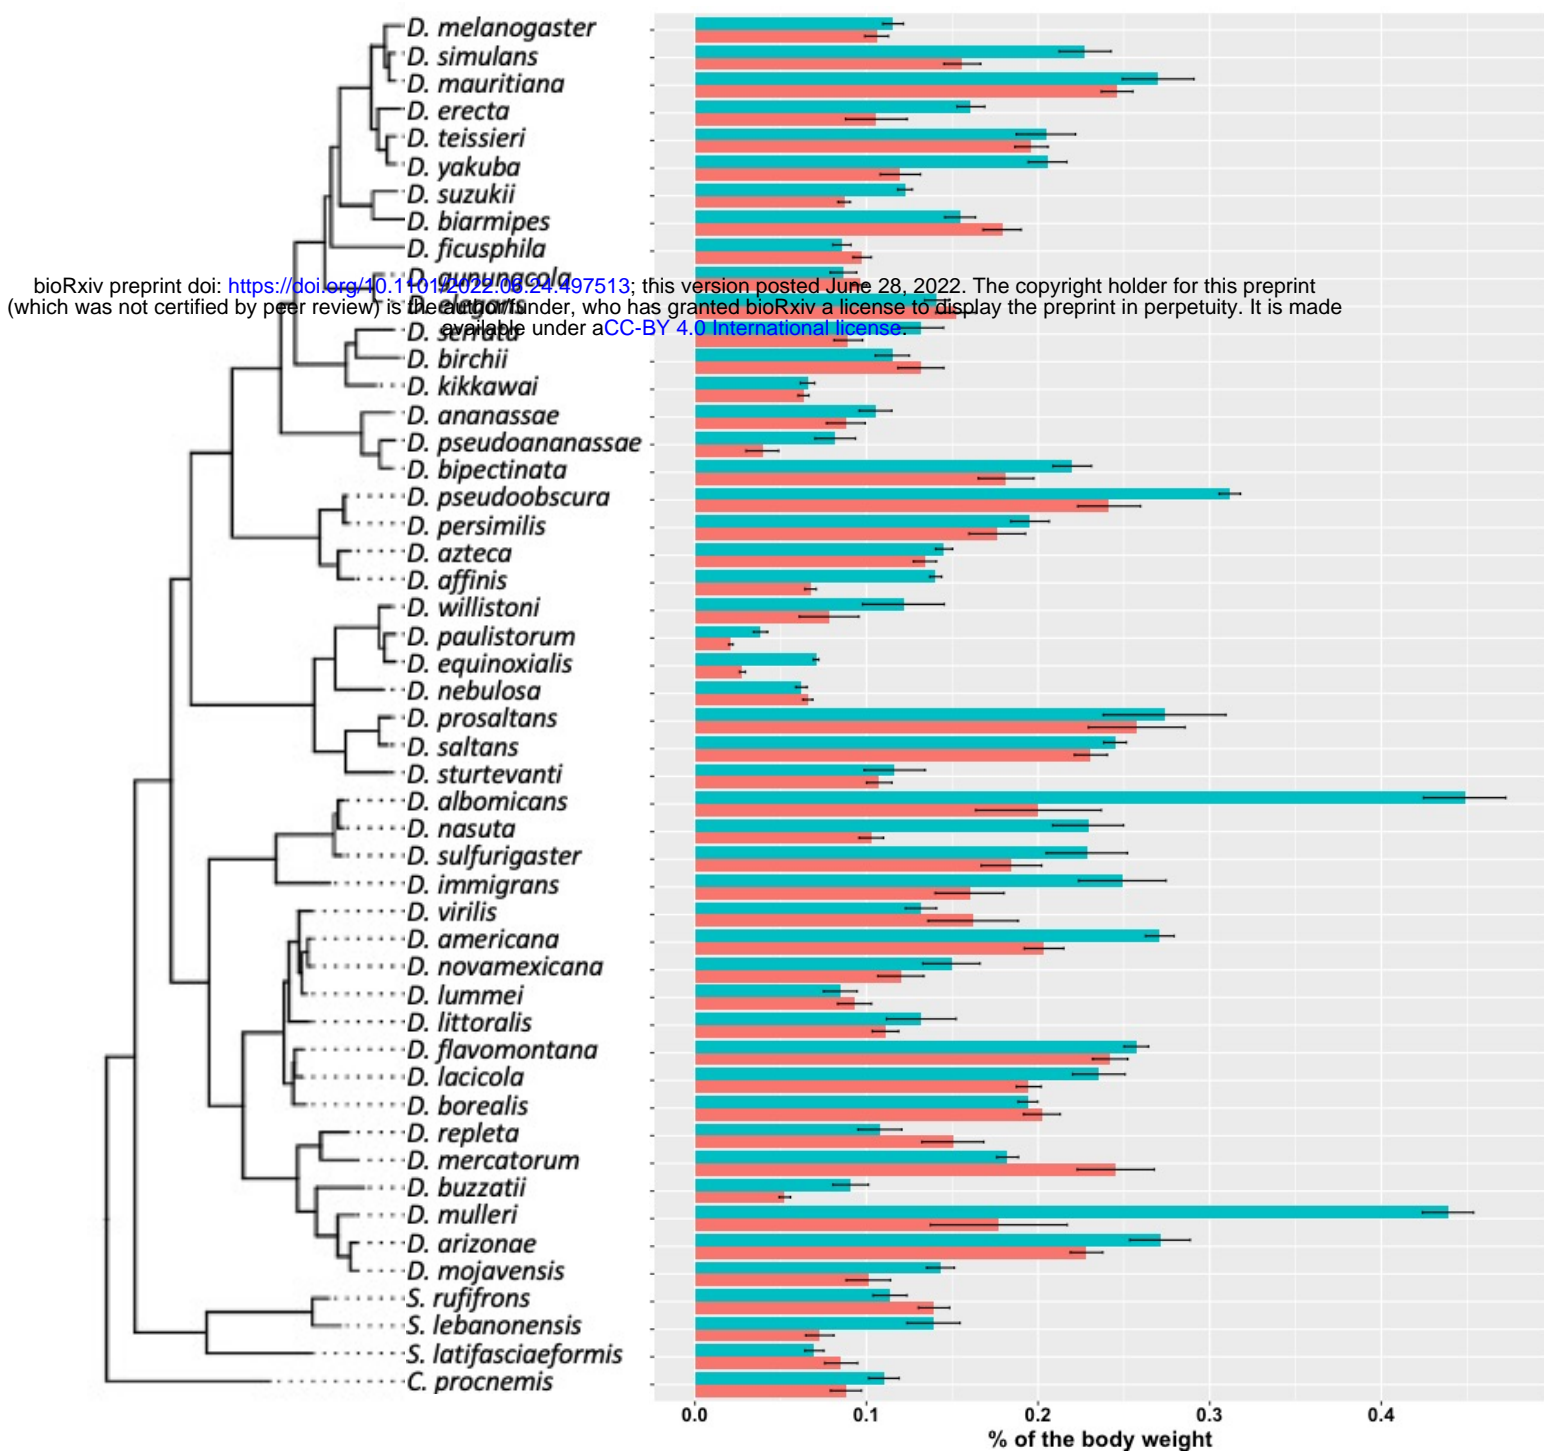

bioRxiv preprint doi: <https://doi.org/10.1101/2022.06.24.497513>; this version posted June 28, 2022. The copyright holder for this preprint (which was not certified by peer review) is the author/funder, who has granted bioRxiv a license to display the preprint in perpetuity. It is made available under aCC-BY 4.0 International license.

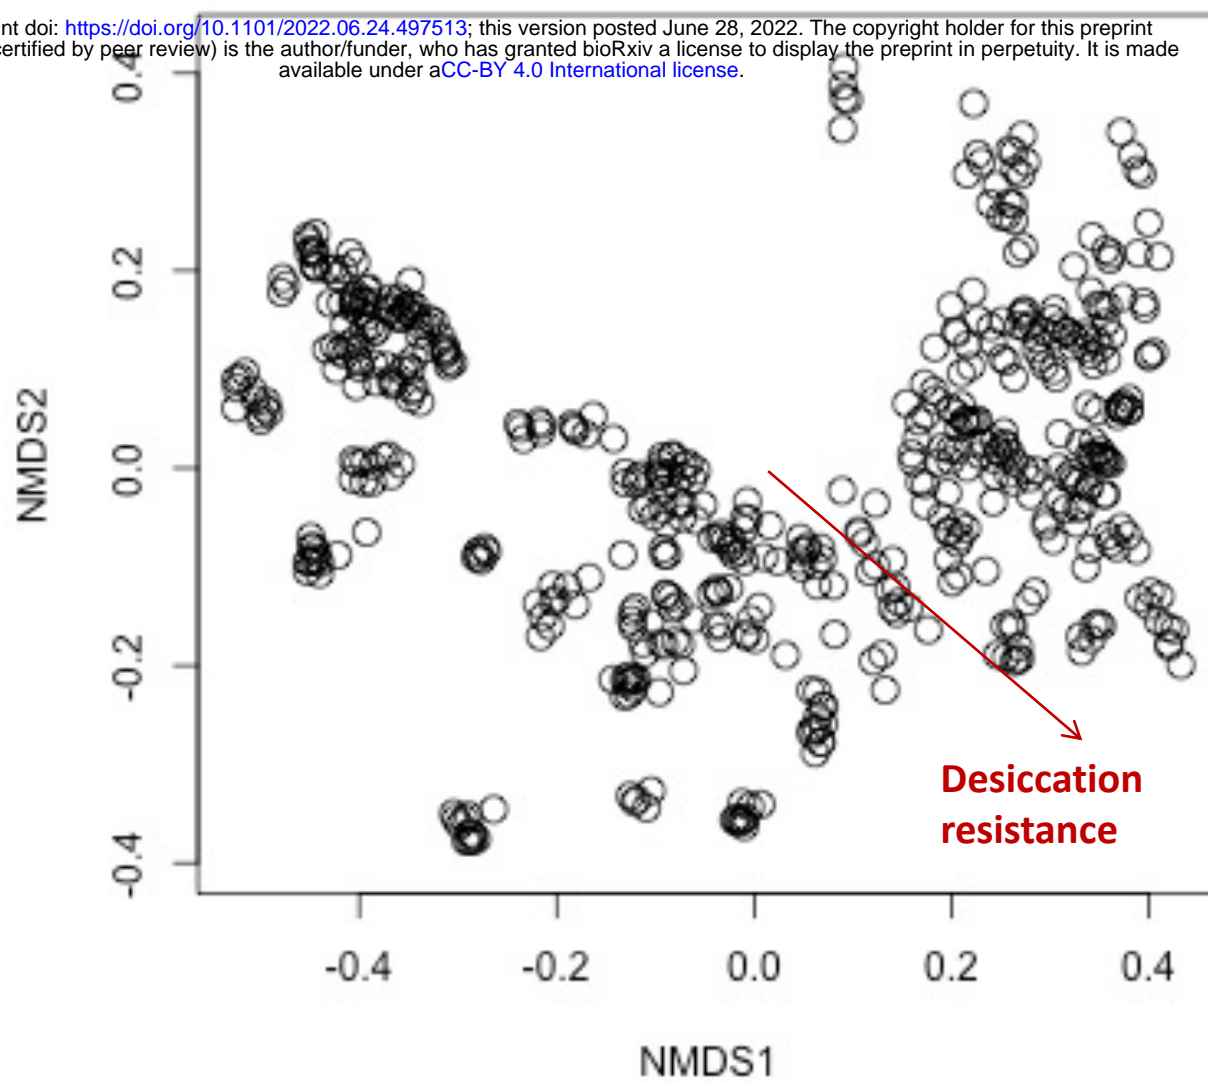



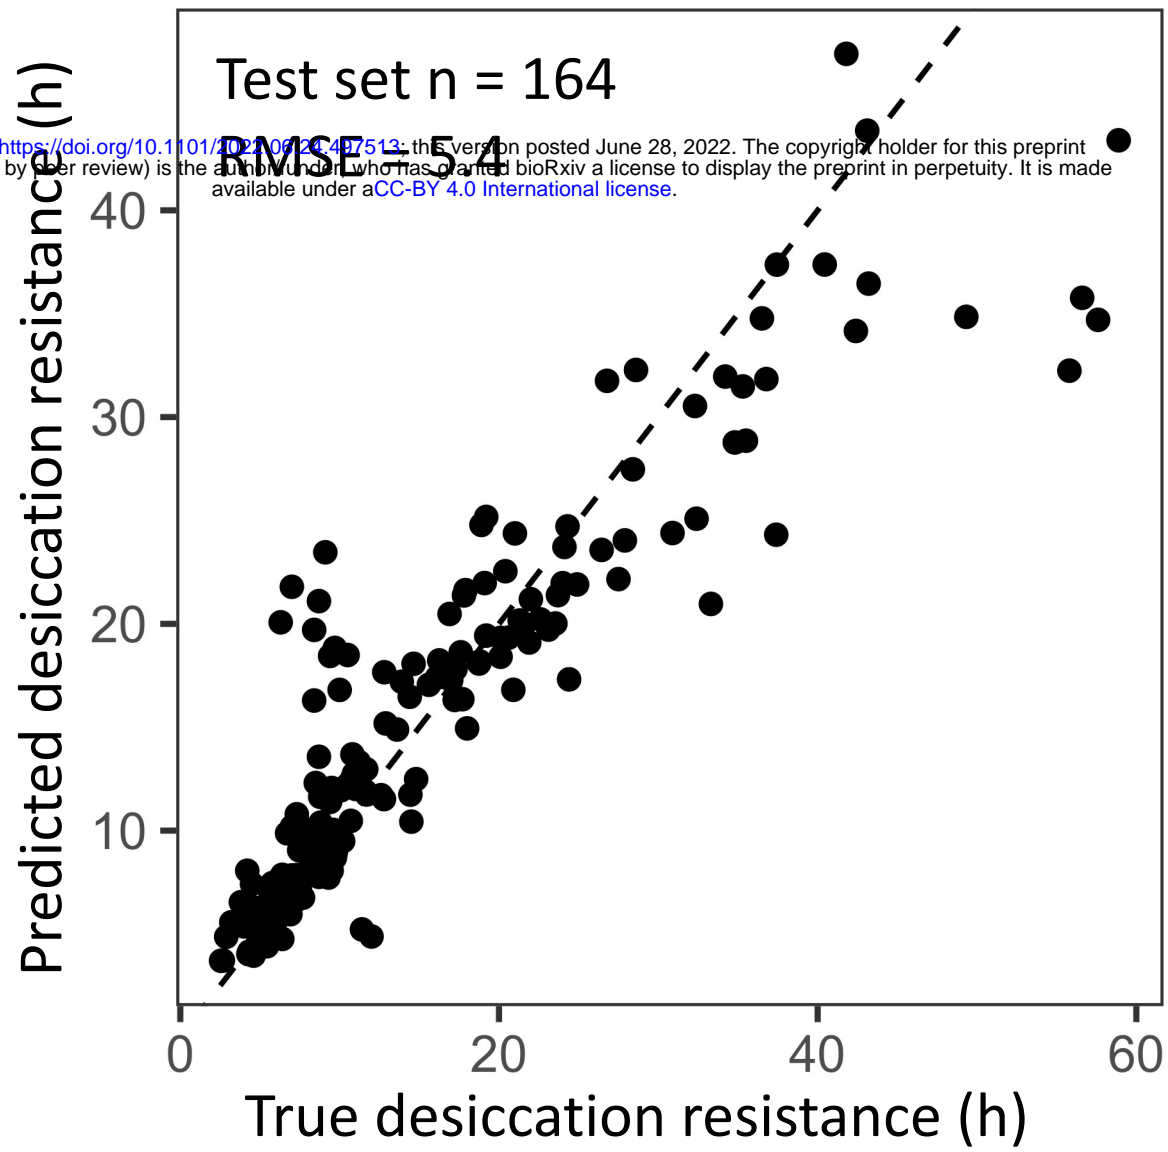

bioRxiv preprint doi: <https://doi.org/10.1101/2022.06.28.497513>; this version posted June 28, 2022. The copyright holder for this preprint (which was not certified by peer review) is the author/funder, who has granted bioRxiv a license to display the preprint in perpetuity. It is made available under aCC-BY 4.0 International license.

Figure S7

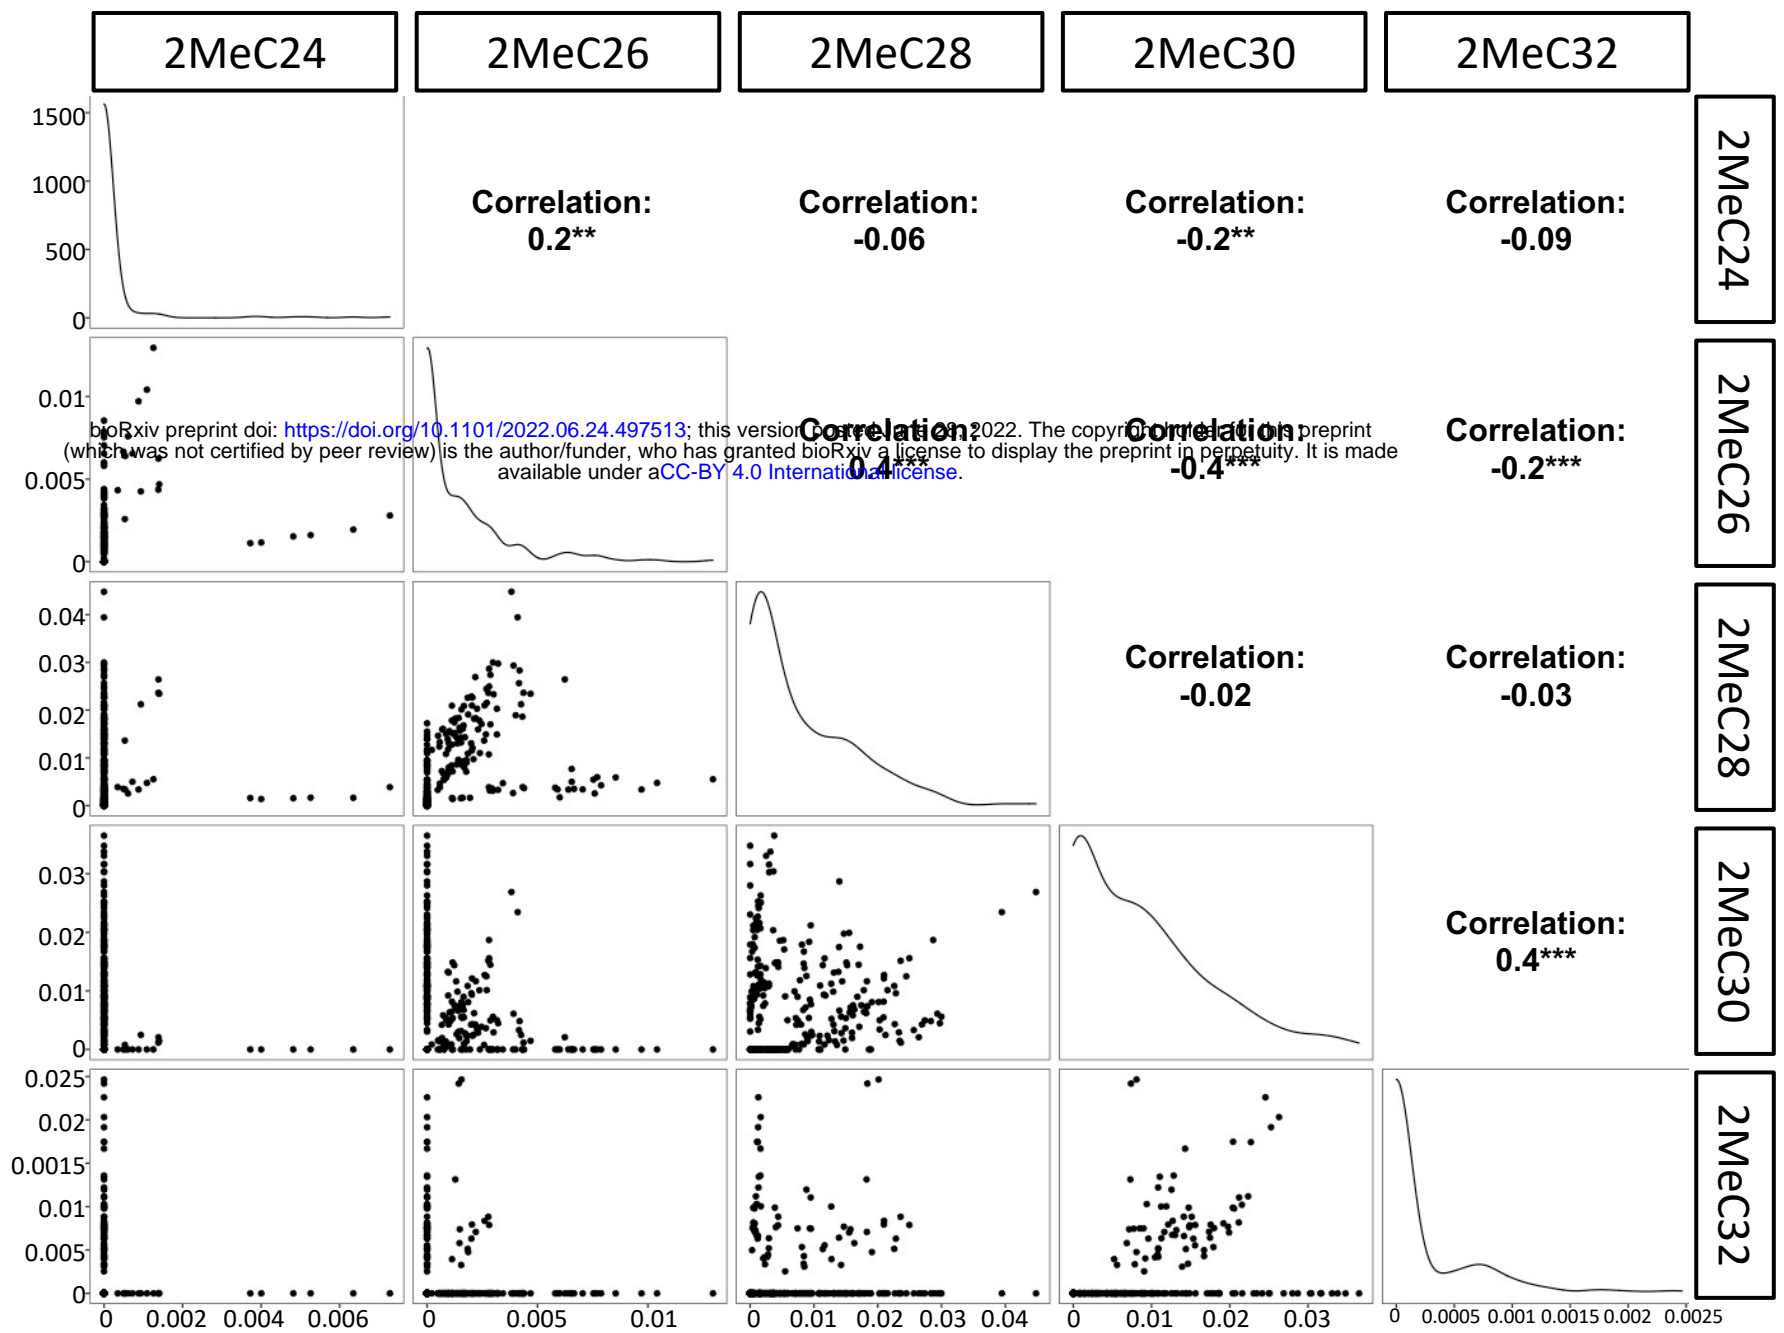

Figure S8

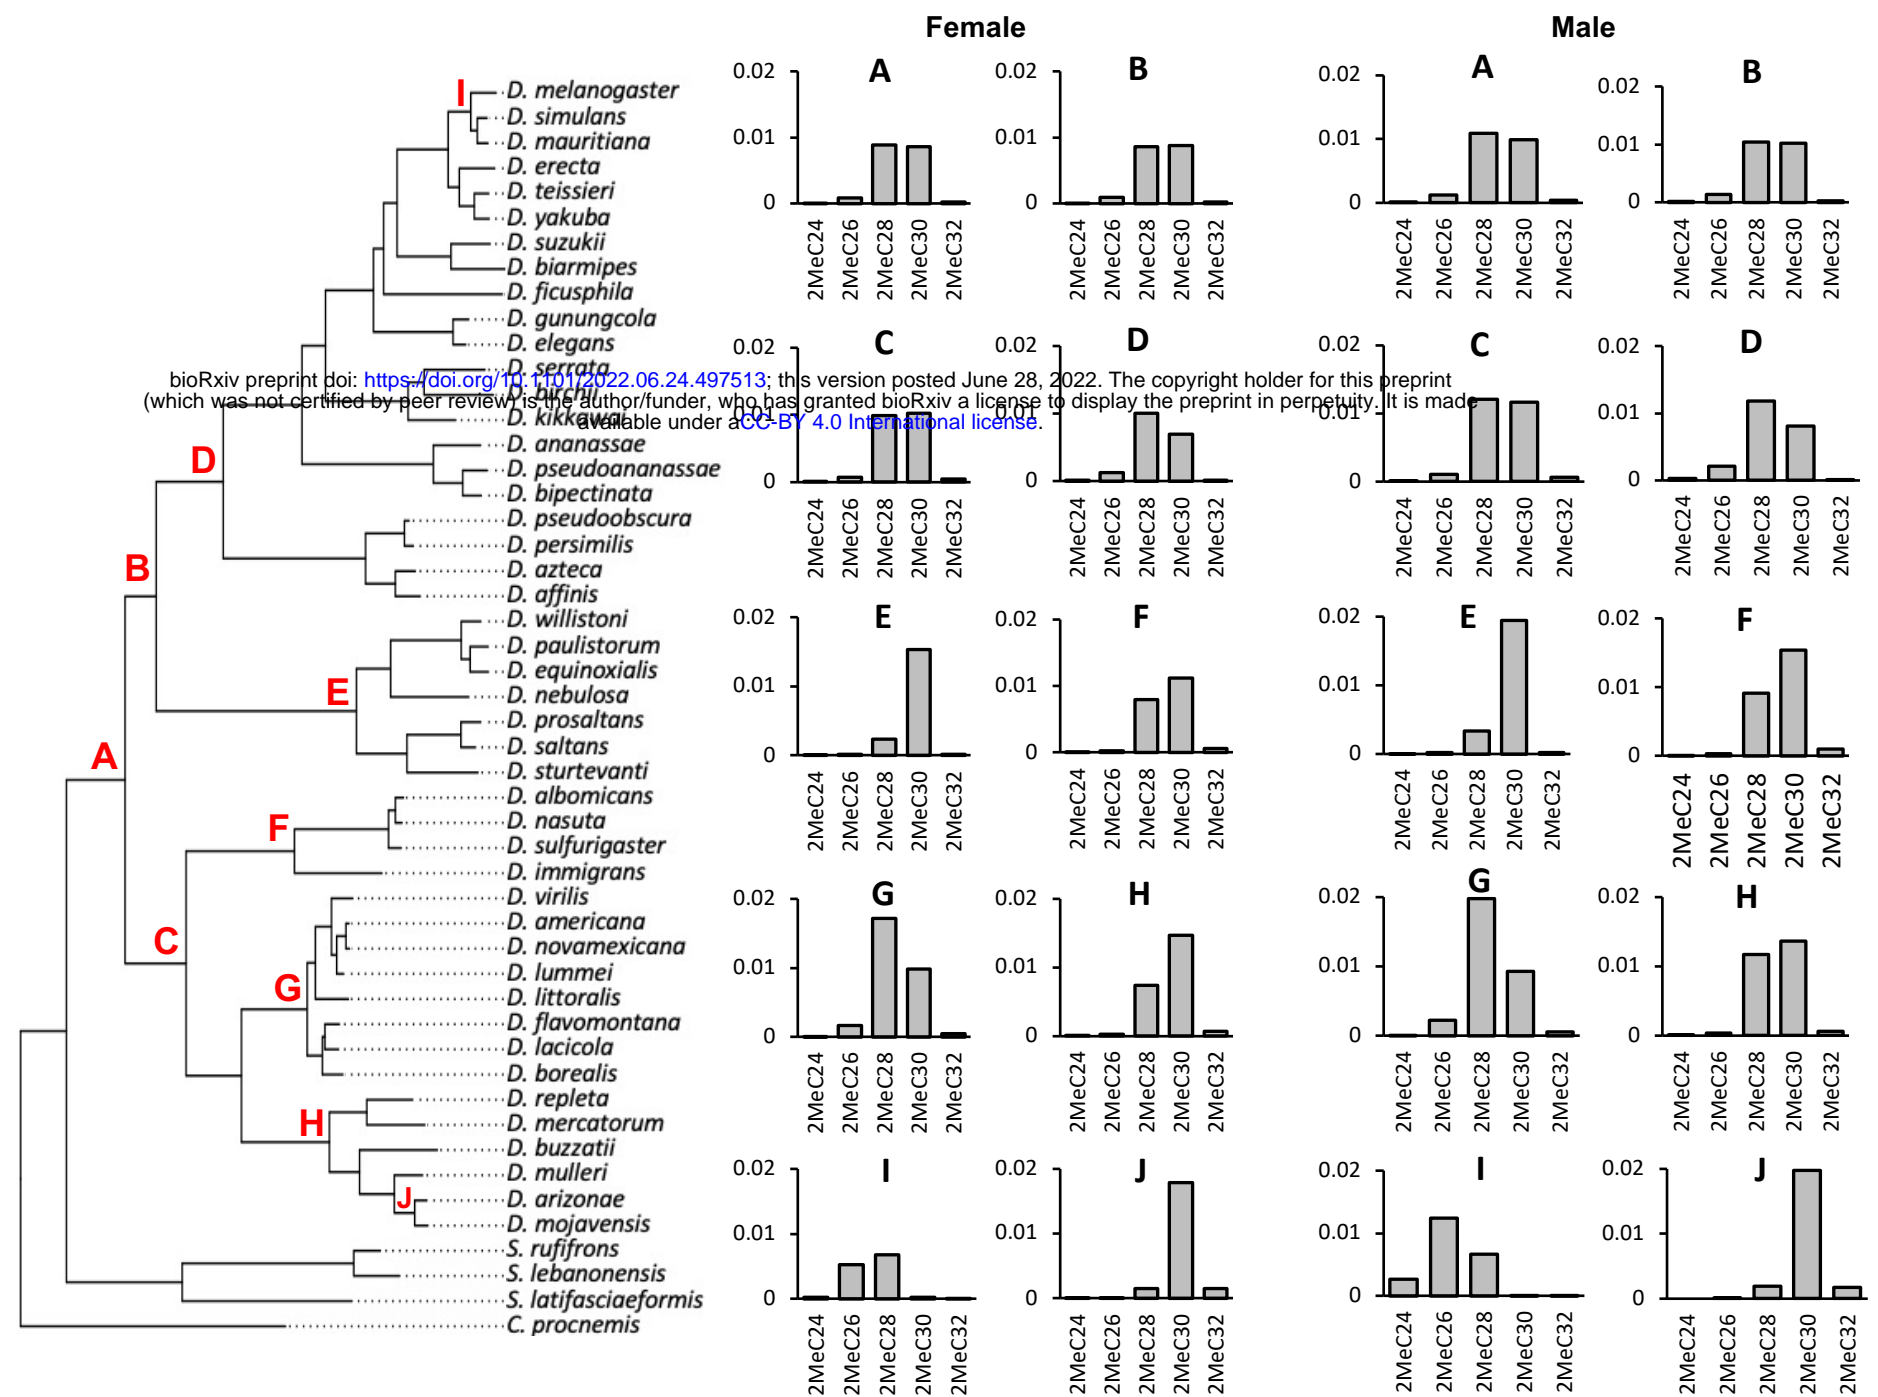

Figure S9

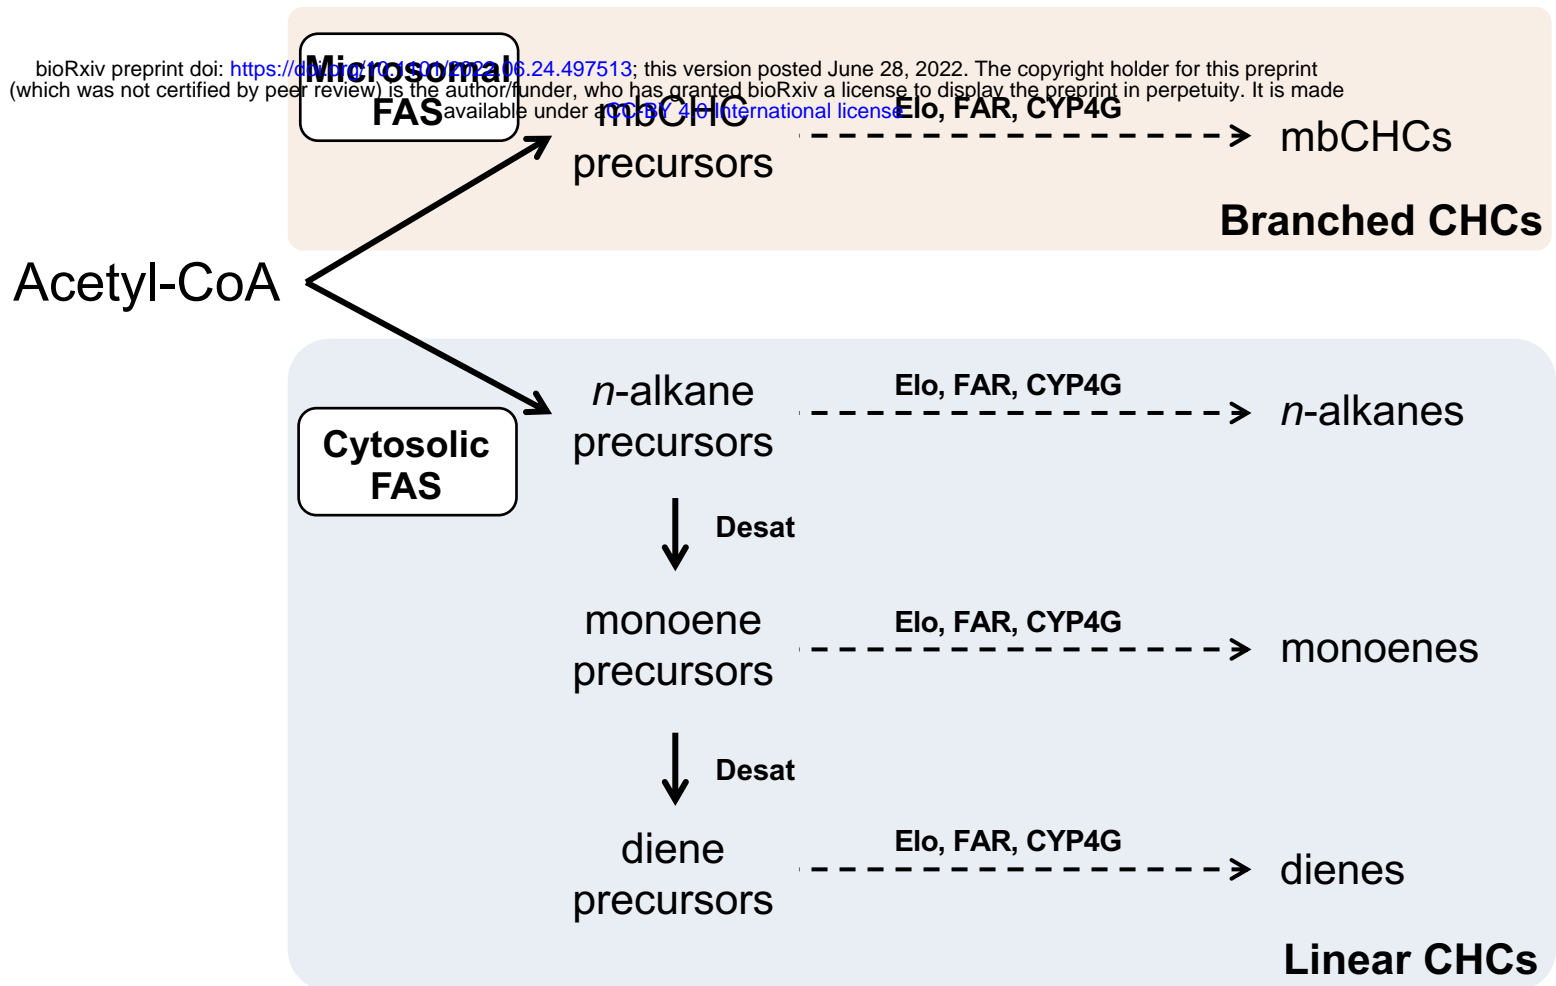

Figure S10

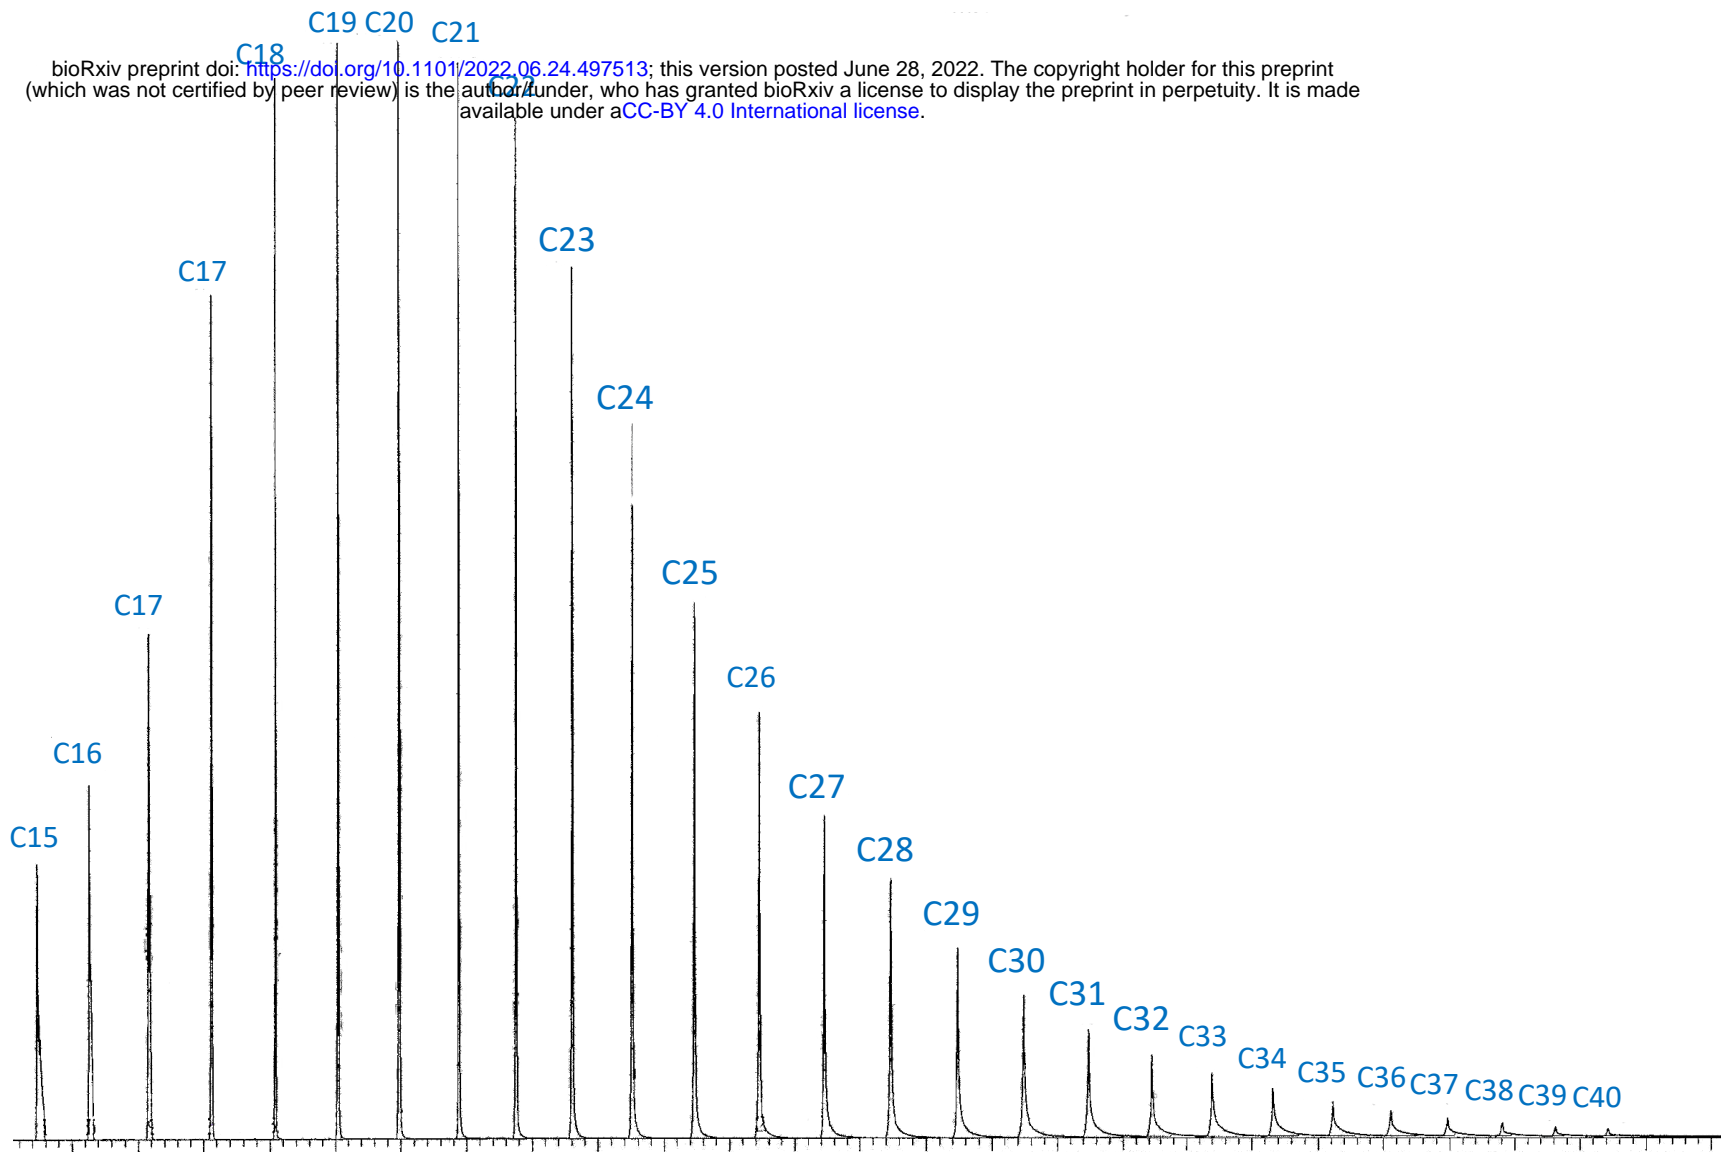

## SUPPLEMENTARY FIGURE LEGENDS

**Figure S1. The phylogeny of 50 *Drosophila* and related species used in this study.** 50 species representing 46 *Drosophila* species (18 from *Drosophila* subgenus, 28 from *Sophophora* subgenus) and four species (3 *Scaptodrosophila* species and 1 *Chymomyza* species) as outgroup were used in our study. The 46 *Drosophila* species represents some of the main groups in the *Drosophila* genus: (1) melanogaster group, (2) obscura group, (3) willistoni group, (4) nasuta group, (5) virilis group, and (6) repleta group.

**Figure S2. Desiccation resistance and body weight in 46 *Drosophila* species and 4 outgroup species.** Desiccation resistance and body weight are shown in separate graphs.

**Figure S3. The melting temperature of CHCs is determined by methyl group, double bonds, and carbon-chain length.** Five types of CHCs are detected in this study. Due to their chemical structures, *n*-alkanes have the highest melting temperatures followed by mbCHCs, monoenes, dienes, and trienes. Increasing length of the carbon-chain can also increase melting temperature. The positions of double bonds in this figure are for illustrative purposes and were not determined in this study.

**Figure S4. CHC quantity as a percentage of body weight.** As *Drosophila* species largely vary in size, we normalized the total CHCs as a percentage of body weight. CHCs account from 0.02% to 0.5% of the total body weight of different species.

**Figure S5. The composition of CHCs significantly differed across the increasing desiccation resistance.** NMDS plot showing the beta diversity of CHCs differs significantly across the increasing desiccation resistance (PERMANOVA:  $r^2 = 0.1$ ,  $P < 0.001$ ), suggesting CHC composition could affect desiccation resistance in the 50 *Drosophila* and selected species.

**Figure S6. Cross-validation of the random forest regression model has a similar performance to the regression model using the full dataset.** A 70:30 training/test split in the dataset ( $n = 382$ ,  $n = 164$ ) was used to evaluate the performance of the random forest regression model. The out of bag estimate of the root mean square error (RMSE) in the split dataset is 5.4, which is similar to the RMSE using the full dataset (RNMSE = 4.5).

**Figure S7. Correlation between different mbCHCs in 50 *Drosophila* and related species.** Correlation between different mbCHCs was determined using Pearson's method. Significant correlations between each pairs of mbCHCs were labeled with stars following with the correlation coefficients. \*\*:  $P < 0.01$ ; \*\*\*:  $P < 0.001$ .



**Figure S8. Ancestral state reconstruction of mbCHC for the *Drosophila* genus.** Bar plots on the right were the derived ancestral state of female and male mbCHC profiles for the common ancestor of the *Drosophila* genus (A), the *Sophophora* subgenus (B), the *Drosophila* subgenus (C), the melanogaster group (D), the willistoni group (E), the nasuta group (F), the virilis group (G), the repleta group (H), the clade of *D. melanogaster*, *D. simulans*, and *D. mauritiana* (I), and the clade of *D. mojavensis* and *D. arizonae* (J). 2MeC28 and 2MeC30 were the major CHCs in the derived ancestral state (A).

**Figure S9. Pathway for the synthesis of branched CHCs (mbCHCs) and linear CHCs (n-alkanes, monoenes, dienes).** All CHCs are synthesized via the fatty acyl-CoA synthesis pathway from acetyl-CoA. The pathway splits early due to the action of two fatty acid synthetases (FAS) into the branched CHC pathway or the linear CHC pathway. The precursors of each pathway are modified by synthesis enzymes such as elongases (Elo), reductases (FAR), and the terminal P450 decarbonylase (CYP4G) into CHCs. For linear CHCs, additional enzymes such as desaturases (Desat) incorporate double bonds during synthesis. The diagram was modified from Chung and Carroll, 2015.

**Figure S10. Chromatogram of the authentic standard *n*-alkane mixture which contains 34 *n*-alkanes from C7 to C40 at the same concentration.** The authentic standard *n*-alkane mixture (C7-C40; Supelco® 49452-U) was obtained from Sigma-Aldrich (St. Louis, MO). C7 – C14 were excluded in the chromatogram due to the solvent delay in the GC-MS program. The integration of peak areas on longer CHCs is biased to have lower values. To address this issue, we corrected the peak areas of CHCs based on the carbon-chain lengths using the integration from this standard *n*-alkane mixture.

## SUPPLEMENTARY TABLES

**Table S1.** Phylogenetic signals for mbCHCs in *Drosophila* species.

| Sex    | 2MeC24 | 2MeC26 | 2MeC28 | 2MeC30 | 2MeC32 | Pagel's $\lambda$ |
|--------|--------|--------|--------|--------|--------|-------------------|
| Female | 92.2%  | 87.9%  | 90.9%  | 90.4%  | 88.8%  | 0.75              |
| Male   | 93.1%  | 90.1%  | 91.9%  | 91.8%  | 92.0%  | 0.82              |

**Table S2.** Phylogenetic signals for desiccation resistance in *Drosophila* species.

| Sex    | Pagel's $\lambda$ | LogLikelihood ( $\lambda$ ) | Likelihood_Ratio ( $\lambda = 0$ ) | P-value |
|--------|-------------------|-----------------------------|------------------------------------|---------|
| Female | 0.91              | -22.4                       | 45.2                               | < 0.001 |
| Male   | 0.97              | -25.4                       | 61.7                               | < 0.001 |

**Table S3.** Summary of the Phylogenetic Generalized Linear Square (PGLS) models between the longest mbCHCs and desiccation resistance for females and males in 50 *Drosophila* and related species.

| Sex    | Term        | t value | P value |
|--------|-------------|---------|---------|
| Female | Length      | 3.2     | 0.002   |
|        | Quantity    | -3.6    | < 0.001 |
|        | Interaction | 3.5     | < 0.001 |
| Male   | Length      | 1.9     | 0.08    |
|        | Quantity    | -2.3    | 0.03    |
|        | Interaction | 2.3     | 0.03    |

**Table S4.** List of species used in this study

| Genus             | Species                | Sources and strain code from NDSSC |
|-------------------|------------------------|------------------------------------|
| <i>Drosophila</i> | <i>D. mojavensis</i>   | 15081-1352.10                      |
| <i>Drosophila</i> | <i>D. arizonae</i>     | 15081-1271.41                      |
| <i>Drosophila</i> | <i>D. aldrichi</i>     | 15081-1251.23                      |
| <i>Drosophila</i> | <i>D. mulleri</i>      | 15081-1371.01                      |
| <i>Drosophila</i> | <i>D. buzzatii</i>     | 15081-1291.63                      |
| <i>Drosophila</i> | <i>D. mercatorum</i>   | 15082-1521.38                      |
| <i>Drosophila</i> | <i>D. repleta</i>      | 15084-1611.13                      |
| <i>Drosophila</i> | <i>D. americana</i>    | 15010-0951.00                      |
| <i>Drosophila</i> | <i>D. novamexicana</i> | 15010-1031.14                      |
| <i>Drosophila</i> | <i>D. lummei</i>       | 15010-1011.01                      |
| <i>Drosophila</i> | <i>D. virilis</i>      | 15010-1051.87                      |

|                         |                             |                                             |
|-------------------------|-----------------------------|---------------------------------------------|
| <i>Drosophila</i>       | <i>D. littoralis</i>        | 15010-1001.11                               |
| <i>Drosophila</i>       | <i>D. lacicola</i>          | 15010-0991.13                               |
| <i>Drosophila</i>       | <i>D. borealis</i>          | 15010-0961.00                               |
| <i>Drosophila</i>       | <i>D. montana</i>           | 15010-1021.23                               |
| <i>Drosophila</i>       | <i>D. flavomontana</i>      | 15010-0981.00                               |
| <i>Drosophila</i>       | <i>D. nasuta</i>            | 15112-1781.00                               |
| <i>Drosophila</i>       | <i>D. albomicans</i>        | 15112-1751.00                               |
| <i>Drosophila</i>       | <i>D. sulfrigaster</i>      | 15112-1811.04                               |
| <i>Drosophila</i>       | <i>D. immigrans</i>         | 15111-1731.03                               |
| <i>Drosophila</i>       | <i>D. equinoxialis</i>      | 14030-0741.00                               |
| <i>Drosophila</i>       | <i>D. paulistorum</i>       | 14030-0771.11                               |
| <i>Drosophila</i>       | <i>D. willistoni</i>        | 14030-0811.24                               |
| <i>Drosophila</i>       | <i>D. nebulosa</i>          | 14030-0761.06                               |
| <i>Drosophila</i>       | <i>D. prosaltans</i>        | 14045-0901.07                               |
| <i>Drosophila</i>       | <i>D. saltans</i>           | 14045-0911.01                               |
| <i>Drosophila</i>       | <i>D. sturtevanti</i>       | 14043-0871.16                               |
| <i>Drosophila</i>       | <i>D. azteca</i>            | 14012-0171.03                               |
| <i>Drosophila</i>       | <i>D. affinis</i>           | 14012-0141.02                               |
| <i>Drosophila</i>       | <i>D. persimilis</i>        | 14011-0111.46                               |
| <i>Drosophila</i>       | <i>D. pseudoobscura</i>     | 14011-0121.94                               |
| <i>Drosophila</i>       | <i>D. bipectinata</i>       | 14024-0381.21                               |
| <i>Drosophila</i>       | <i>D. ananassae</i>         | 14024- 0371.13                              |
| <i>Drosophila</i>       | <i>D. serrata</i>           | 14028-0681.00                               |
| <i>Drosophila</i>       | <i>D. kikkawai</i>          | 14028-0561.14                               |
| <i>Drosophila</i>       | <i>D. birchii</i>           | 14028-0521.00                               |
| <i>Drosophila</i>       | <i>D. elegans</i>           | Gift from the P. Wittkopp Lab (U. Michigan) |
| <i>Drosophila</i>       | <i>D. gunungcola</i>        | Gift from the P. Wittkopp Lab (U. Michigan) |
| <i>Drosophila</i>       | <i>D. biarmipes</i>         | 14023-0361.09                               |
| <i>Drosophila</i>       | <i>D. suzukii</i>           | Gift from the R. Isaacs Lab (MSU)           |
| <i>Drosophila</i>       | <i>D. erecta</i>            | 14021-0224.01                               |
| <i>Drosophila</i>       | <i>D. teissieri</i>         | 14021-0257.01                               |
| <i>Drosophila</i>       | <i>D. yakuba</i>            | 14021-0261-01                               |
| <i>Drosophila</i>       | <i>D. mauritiana</i>        | 14021-0241.151                              |
| <i>Drosophila</i>       | <i>D. simulans</i>          | W501 (14021-0251.195)                       |
| <i>Drosophila</i>       | <i>D. melanogaster</i>      | Gift from the Carroll Lab (U. Maryland)     |
| <i>Scaptodrosophila</i> | <i>S. latifasciaeformis</i> | 11030-0061.01                               |

|                         |                        |               |
|-------------------------|------------------------|---------------|
| <i>Scaptodrosophila</i> | <i>S. lebanonensis</i> | 11010-0011.00 |
| <i>Scaptodrosophila</i> | <i>S. rufifrons</i>    | 11040-0071.00 |
| <i>Chymomyza</i>        | <i>C. procnemis</i>    | 20000-2631.01 |
